# Supplementary material for: An integrated proteomic and transcriptomic signature of the failing right ventricle in monocrotaline induced pulmonary arterial hypertension in male rats
Source: Front Physiol. 2022 Nov 1;13:966454. doi: 10.3389/fphys.2022.966454 (PMC9664166; doi:10.3389/fphys.2022.966454)
Supplement: Supplementary file 4 [file DataSheet3.xlsx]

## Sheet: BP_Prot+RNA
	ID	Description	GeneRatio	BgRatio	pvalue	p.adjust	qvalue	geneID	Count
GO:0006091	GO:0006091	generation of precursor metabolites and energy	54/389	393/16870	1.24503e-26	4.68506e-23	4.1571e-23	Cisd1/Ndufv3/Pfkl/Mdh2/Txnrd2/Atp5po/Phka1/Cybb/Fh/Tefm/Dlst/Suclg1/Ndufa8/Ndufa5/Galk1/Ndufa7/Ndufa12/Acat1/Pdhb/Sdhb/Mdh1/Ndufb9/Etfdh/Cox6c/Ndufs4/Ndufs1/Cyc1/Sdha/Pgam2/Idh2/Ndufb8/Etfa/Sh3bgrl3/Coq9/Sucla2/Etfb/Ndufv1/Uqcrfs1/Bax/Pygm/LOC679739/Aldh5a1/Nipsnap2/Aco2/Uqcrb/Hk3/Coq10a/COX2/Uqcrc1/Ndufs2/Cox7a2/Pgam1/Ndufaf2/Pfkm	54
GO:0051186	GO:0051186	cofactor metabolic process	58/389	485/16870	2.1729e-25	4.08832e-22	3.6276e-22	Glo1/Acacb/Pfkl/Mdh2/Pdk1/Cpox/Sod1/Qdpr/Cybb/Dlst/Suclg1/Gclc/Galk1/Sptb/Adhfe1/Acss1/Acot11/Acat1/Pdhb/Mdh1/Akr1b1/Coq3/Prdx3/Got2/Ppt1/Ldhb/Pgam2/Acaa2/Idh2/Hmox1/Me2/Coq9/Acsl5/Got1/Gstk1/Acly/Sucla2/Akr7a2/Isca1/Ugt1a1/Naxe/Prdx5/Dcakd/Aldh5a1/Cbr4/Mri1/Hk3/Coq10a/COX2/Gsta4/Fmo1/Gstz1/Dcxr/Pgam1/Nadk2/G6pd/Pfkm/Ndufa9	58
GO:0045333	GO:0045333	cellular respiration	35/389	161/16870	2.44002e-24	3.0606e-21	2.7157e-21	Cisd1/Ndufv3/Mdh2/Fh/Dlst/Suclg1/Ndufa8/Ndufa5/Ndufa7/Ndufa12/Pdhb/Sdhb/Mdh1/Ndufb9/Etfdh/Ndufs4/Ndufs1/Cyc1/Sdha/Idh2/Ndufb8/Coq9/Sucla2/Ndufv1/Uqcrfs1/Bax/LOC679739/Aldh5a1/Aco2/Uqcrb/Coq10a/COX2/Uqcrc1/Ndufs2/Ndufaf2	35
GO:0009150	GO:0009150	purine ribonucleotide metabolic process	53/389	427/16870	5.2972e-24	4.98334e-21	4.42176e-21	Atp5me/Acacb/Ndufv3/Pfkl/Pdk1/Atp5po/Atp5f1b/Atp5pd/Tefm/Adss/Dmac2l/Dlst/Suclg1/Ndufa8/Galk1/Ndufa7/Acss1/Atp1a2/Ndufa12/Acot11/Acat1/Pdhb/Nppa/Ndufb9/Papss1/Ndufs1/Cyc1/Sdha/Pgam2/Acaa2/Ndufb8/Gtpbp1/Coq9/Acsl5/Acly/Sucla2/Ndufv1/Uqcrfs1/Dcakd/LOC679739/Nipsnap2/Uqcrb/Hk3/Atp5mf/Atp5mg/COX2/Uqcrc1/Ndufs2/Cox7a2/Tmsb4x/Atp5f1e/Pgam1/Pfkm	53
GO:0006163	GO:0006163	purine nucleotide metabolic process	54/389	450/16870	9.82365e-24	7.39328e-21	6.56013e-21	Atp5me/Acacb/Ndufv3/Pfkl/Pdk1/Atp5po/Atp5f1b/Atp5pd/Tefm/Adss/Dmac2l/Dlst/Suclg1/Ndufa8/Galk1/Ndufa7/Acss1/Atp1a2/Ndufa12/Acot11/Acat1/Pdhb/Nppa/Ndufb9/Ada/Papss1/Ndufs1/Cyc1/Sdha/Pgam2/Acaa2/Ndufb8/Gtpbp1/Coq9/Acsl5/Acly/Sucla2/Ndufv1/Uqcrfs1/Dcakd/LOC679739/Nipsnap2/Uqcrb/Hk3/Atp5mf/Atp5mg/COX2/Uqcrc1/Ndufs2/Cox7a2/Tmsb4x/Atp5f1e/Pgam1/Pfkm	54
GO:0072521	GO:0072521	purine-containing compound metabolic process	56/389	494/16870	2.28728e-23	1.23628e-20	1.09696e-20	Atp5me/Acacb/Ndufv3/Pfkl/Pdk1/Atp5po/Atp5f1b/Atp5pd/Tefm/Adss/Dmac2l/Dlst/Suclg1/Ndufa8/Galk1/Ndufa7/Acss1/Atp1a2/Ndufa12/Acot11/Acat1/Pdhb/Nppa/Ndufb9/Ada/Papss1/Ndufs1/Cyc1/Sdha/Pgam2/Acaa2/Ndufb8/Gtpbp1/Coq9/Acsl5/Acly/Sucla2/Ndufv1/Uqcrfs1/Macrod1/Dcakd/LOC679739/Nipsnap2/Uqcrb/Mri1/Hk3/Atp5mf/Atp5mg/COX2/Uqcrc1/Ndufs2/Cox7a2/Tmsb4x/Atp5f1e/Pgam1/Pfkm	56
GO:0019693	GO:0019693	ribose phosphate metabolic process	54/389	458/16870	2.29974e-23	1.23628e-20	1.09696e-20	Atp5me/Acacb/Ndufv3/Pfkl/Pdk1/Atp5po/Atp5f1b/Atp5pd/Tefm/Adss/Dmac2l/Dlst/Suclg1/Ndufa8/Galk1/Ndufa7/Acss1/Atp1a2/Ndufa12/Acot11/Acat1/Pdhb/Nppa/Ndufb9/Papss1/Ndufs1/Cyc1/Sdha/Pgam2/Acaa2/Ndufb8/Gtpbp1/Coq9/Acsl5/Acly/Sucla2/Ndufv1/Uqcrfs1/Dcakd/LOC679739/Nipsnap2/Uqcrb/Hk3/Atp5mf/Atp5mg/COX2/Uqcrc1/Ndufs2/Cox7a2/Tmsb4x/Atp5f1e/Pgam1/G6pd/Pfkm	54
GO:0009259	GO:0009259	ribonucleotide metabolic process	53/389	442/16870	2.74772e-23	1.29246e-20	1.14681e-20	Atp5me/Acacb/Ndufv3/Pfkl/Pdk1/Atp5po/Atp5f1b/Atp5pd/Tefm/Adss/Dmac2l/Dlst/Suclg1/Ndufa8/Galk1/Ndufa7/Acss1/Atp1a2/Ndufa12/Acot11/Acat1/Pdhb/Nppa/Ndufb9/Papss1/Ndufs1/Cyc1/Sdha/Pgam2/Acaa2/Ndufb8/Gtpbp1/Coq9/Acsl5/Acly/Sucla2/Ndufv1/Uqcrfs1/Dcakd/LOC679739/Nipsnap2/Uqcrb/Hk3/Atp5mf/Atp5mg/COX2/Uqcrc1/Ndufs2/Cox7a2/Tmsb4x/Atp5f1e/Pgam1/Pfkm	53
GO:0022900	GO:0022900	electron transport chain	30/389	135/16870	2.61619e-21	1.09386e-18	9.70593e-19	Ndufv3/Txnrd2/Cybb/Ndufa8/Ndufa5/Ndufa7/Ndufa12/Sdhb/Ndufb9/Etfdh/Cox6c/Ndufs4/Ndufs1/Cyc1/Sdha/Ndufb8/Etfa/Sh3bgrl3/Coq9/Etfb/Ndufv1/Uqcrfs1/LOC679739/Aldh5a1/Uqcrb/COX2/Uqcrc1/Ndufs2/Cox7a2/Ndufaf2	30
GO:0015980	GO:0015980	energy derivation by oxidation of organic compounds	38/389	247/16870	1.05397e-20	3.9661e-18	3.51916e-18	Cisd1/Ndufv3/Mdh2/Phka1/Fh/Dlst/Suclg1/Ndufa8/Ndufa5/Ndufa7/Ndufa12/Pdhb/Sdhb/Mdh1/Ndufb9/Etfdh/Ndufs4/Ndufs1/Cyc1/Sdha/Idh2/Ndufb8/Coq9/Sucla2/Ndufv1/Uqcrfs1/Bax/Pygm/LOC679739/Aldh5a1/Aco2/Uqcrb/Coq10a/COX2/Uqcrc1/Ndufs2/Ndufaf2/Pfkm	38
GO:0009141	GO:0009141	nucleoside triphosphate metabolic process	40/389	283/16870	2.32114e-20	7.9404e-18	7.0456e-18	Atp5me/Ndufv3/Pfkl/Atp5po/Atp5f1b/Atp5pd/Tefm/Dmac2l/Suclg1/Ndufa8/Galk1/Ndufa7/Dut/Atp1a2/Ndufa12/Ndufb9/Ada/Ndufs1/Cyc1/Sdha/Pgam2/Ndufb8/Gtpbp1/Coq9/Ndufv1/Uqcrfs1/LOC679739/Nipsnap2/Uqcrb/Hk3/Atp5mf/Atp5mg/COX2/Uqcrc1/Ndufs2/Cox7a2/Tmsb4x/Atp5f1e/Pgam1/Pfkm	40
GO:0046034	GO:0046034	ATP metabolic process	36/389	232/16870	8.57241e-20	2.68817e-17	2.38524e-17	Atp5me/Ndufv3/Pfkl/Atp5po/Atp5f1b/Atp5pd/Tefm/Dmac2l/Ndufa8/Galk1/Ndufa7/Atp1a2/Ndufa12/Ndufb9/Ndufs1/Cyc1/Sdha/Pgam2/Ndufb8/Coq9/Ndufv1/Uqcrfs1/LOC679739/Nipsnap2/Uqcrb/Hk3/Atp5mf/Atp5mg/COX2/Uqcrc1/Ndufs2/Cox7a2/Tmsb4x/Atp5f1e/Pgam1/Pfkm	36
GO:0009167	GO:0009167	purine ribonucleoside monophosphate metabolic process	38/389	263/16870	9.95842e-20	2.85843e-17	2.53631e-17	Atp5me/Ndufv3/Pfkl/Atp5po/Atp5f1b/Atp5pd/Tefm/Adss/Dmac2l/Ndufa8/Galk1/Ndufa7/Atp1a2/Ndufa12/Ndufb9/Ada/Ndufs1/Cyc1/Sdha/Pgam2/Ndufb8/Coq9/Ndufv1/Uqcrfs1/LOC679739/Nipsnap2/Uqcrb/Hk3/Atp5mf/Atp5mg/COX2/Uqcrc1/Ndufs2/Cox7a2/Tmsb4x/Atp5f1e/Pgam1/Pfkm	38
GO:0009126	GO:0009126	purine nucleoside monophosphate metabolic process	38/389	264/16870	1.13942e-19	2.85843e-17	2.53631e-17	Atp5me/Ndufv3/Pfkl/Atp5po/Atp5f1b/Atp5pd/Tefm/Adss/Dmac2l/Ndufa8/Galk1/Ndufa7/Atp1a2/Ndufa12/Ndufb9/Ada/Ndufs1/Cyc1/Sdha/Pgam2/Ndufb8/Coq9/Ndufv1/Uqcrfs1/LOC679739/Nipsnap2/Uqcrb/Hk3/Atp5mf/Atp5mg/COX2/Uqcrc1/Ndufs2/Cox7a2/Tmsb4x/Atp5f1e/Pgam1/Pfkm	38
GO:0009144	GO:0009144	purine nucleoside triphosphate metabolic process	38/389	264/16870	1.13942e-19	2.85843e-17	2.53631e-17	Atp5me/Ndufv3/Pfkl/Atp5po/Atp5f1b/Atp5pd/Tefm/Dmac2l/Ndufa8/Galk1/Ndufa7/Atp1a2/Ndufa12/Ndufb9/Ada/Ndufs1/Cyc1/Sdha/Pgam2/Ndufb8/Gtpbp1/Coq9/Ndufv1/Uqcrfs1/LOC679739/Nipsnap2/Uqcrb/Hk3/Atp5mf/Atp5mg/COX2/Uqcrc1/Ndufs2/Cox7a2/Tmsb4x/Atp5f1e/Pgam1/Pfkm	38
GO:0009205	GO:0009205	purine ribonucleoside triphosphate metabolic process	37/389	256/16870	3.06774e-19	7.21495e-17	6.4019e-17	Atp5me/Ndufv3/Pfkl/Atp5po/Atp5f1b/Atp5pd/Tefm/Dmac2l/Ndufa8/Galk1/Ndufa7/Atp1a2/Ndufa12/Ndufb9/Ndufs1/Cyc1/Sdha/Pgam2/Ndufb8/Gtpbp1/Coq9/Ndufv1/Uqcrfs1/LOC679739/Nipsnap2/Uqcrb/Hk3/Atp5mf/Atp5mg/COX2/Uqcrc1/Ndufs2/Cox7a2/Tmsb4x/Atp5f1e/Pgam1/Pfkm	37
GO:0009161	GO:0009161	ribonucleoside monophosphate metabolic process	38/389	275/16870	4.81273e-19	1.06531e-16	9.45263e-17	Atp5me/Ndufv3/Pfkl/Atp5po/Atp5f1b/Atp5pd/Tefm/Adss/Dmac2l/Ndufa8/Galk1/Ndufa7/Atp1a2/Ndufa12/Ndufb9/Ada/Ndufs1/Cyc1/Sdha/Pgam2/Ndufb8/Coq9/Ndufv1/Uqcrfs1/LOC679739/Nipsnap2/Uqcrb/Hk3/Atp5mf/Atp5mg/COX2/Uqcrc1/Ndufs2/Cox7a2/Tmsb4x/Atp5f1e/Pgam1/Pfkm	38
GO:0009199	GO:0009199	ribonucleoside triphosphate metabolic process	37/389	262/16870	6.81678e-19	1.42509e-16	1.26449e-16	Atp5me/Ndufv3/Pfkl/Atp5po/Atp5f1b/Atp5pd/Tefm/Dmac2l/Ndufa8/Galk1/Ndufa7/Atp1a2/Ndufa12/Ndufb9/Ndufs1/Cyc1/Sdha/Pgam2/Ndufb8/Gtpbp1/Coq9/Ndufv1/Uqcrfs1/LOC679739/Nipsnap2/Uqcrb/Hk3/Atp5mf/Atp5mg/COX2/Uqcrc1/Ndufs2/Cox7a2/Tmsb4x/Atp5f1e/Pgam1/Pfkm	37
GO:0009123	GO:0009123	nucleoside monophosphate metabolic process	39/389	297/16870	9.99209e-19	1.97896e-16	1.75595e-16	Atp5me/Ndufv3/Pfkl/Atp5po/Atp5f1b/Atp5pd/Tefm/Adss/Dmac2l/Ndufa8/Galk1/Ndufa7/Dut/Atp1a2/Ndufa12/Ndufb9/Ada/Ndufs1/Cyc1/Sdha/Pgam2/Ndufb8/Coq9/Ndufv1/Uqcrfs1/LOC679739/Nipsnap2/Uqcrb/Hk3/Atp5mf/Atp5mg/COX2/Uqcrc1/Ndufs2/Cox7a2/Tmsb4x/Atp5f1e/Pgam1/Pfkm	39
GO:0016054	GO:0016054	organic acid catabolic process	33/389	219/16870	7.80629e-18	1.39881e-15	1.24118e-15	Acacb/Gusb/Acads/Qdpr/Dlst/Adhfe1/Acat1/Hibadh/Decr1/Ivd/Etfdh/Bckdhb/Hadh/Auh/Got2/Fabp3/Acadl/Mccc1/Acaa2/Acsf3/Etfa/Pccb/Acsl5/Got1/Etfb/Ldhd/Bckdk/Aldh5a1/Hadha/Eci2/Gstz1/Plin5/Iffo2	33
GO:0046395	GO:0046395	carboxylic acid catabolic process	33/389	219/16870	7.80629e-18	1.39881e-15	1.24118e-15	Acacb/Gusb/Acads/Qdpr/Dlst/Adhfe1/Acat1/Hibadh/Decr1/Ivd/Etfdh/Bckdhb/Hadh/Auh/Got2/Fabp3/Acadl/Mccc1/Acaa2/Acsf3/Etfa/Pccb/Acsl5/Got1/Etfb/Ldhd/Bckdk/Aldh5a1/Hadha/Eci2/Gstz1/Plin5/Iffo2	33
GO:0044282	GO:0044282	small molecule catabolic process	39/389	321/16870	1.54272e-17	2.63876e-15	2.3414e-15	Acacb/Gusb/Acads/Pfkl/Qdpr/Dlst/Galk1/Adhfe1/Acat1/Hibadh/Decr1/Ivd/Etfdh/Bckdhb/Ada/Hadh/Auh/Got2/Fabp3/Acadl/Mccc1/Acaa2/Acsf3/Etfa/Pccb/Acsl5/Got1/Sord/Etfb/Impa2/Ldhd/Bckdk/Aldh5a1/Hadha/Eci2/Gstz1/Plin5/Pfkm/Iffo2	39
GO:0022904	GO:0022904	respiratory electron transport chain	22/389	85/16870	1.78217e-17	2.91578e-15	2.5872e-15	Ndufv3/Ndufa8/Ndufa5/Ndufa7/Ndufa12/Sdhb/Ndufb9/Etfdh/Ndufs1/Cyc1/Sdha/Ndufb8/Coq9/Ndufv1/Uqcrfs1/LOC679739/Aldh5a1/Uqcrb/COX2/Uqcrc1/Ndufs2/Ndufaf2	22
GO:0010257	GO:0010257	NADH dehydrogenase complex assembly	17/389	44/16870	4.04771e-17	6.09262e-15	5.40604e-15	Ndufb4/Ndufa8/Ndufa5/Ndufb11/Ndufb9/Ndufs4/Ndufb5/Ndufb8/Ndufb10/Timm21/Ndufa2/Ndufab1/Dmac2/Ndufa13/Ndufb7/Ndufa3/Ndufa9	17
GO:0032981	GO:0032981	mitochondrial respiratory chain complex I assembly	17/389	44/16870	4.04771e-17	6.09262e-15	5.40604e-15	Ndufb4/Ndufa8/Ndufa5/Ndufb11/Ndufb9/Ndufs4/Ndufb5/Ndufb8/Ndufb10/Timm21/Ndufa2/Ndufab1/Dmac2/Ndufa13/Ndufb7/Ndufa3/Ndufa9	17
GO:0033108	GO:0033108	mitochondrial respiratory chain complex assembly	20/389	72/16870	1.15873e-16	1.67704e-14	1.48805e-14	Ndufb4/Ndufa8/Ndufa5/Ndufb11/Ndufb9/Ndufs4/Ndufb5/Samm50/Ndufb8/Ndufb10/Timm21/Ndufa2/Ndufab1/Dmac2/Ndufa13/Uqcrb/Ndufb7/Uqcc1/Ndufa3/Ndufa9	20
GO:0006732	GO:0006732	coenzyme metabolic process	37/389	317/16870	4.0606e-16	5.65927e-14	5.02152e-14	Acacb/Pfkl/Mdh2/Pdk1/Qdpr/Dlst/Suclg1/Gclc/Galk1/Acss1/Acot11/Acat1/Pdhb/Mdh1/Coq3/Ldhb/Pgam2/Acaa2/Idh2/Me2/Coq9/Acsl5/Acly/Sucla2/Naxe/Prdx5/Dcakd/Mri1/Hk3/Coq10a/Fmo1/Dcxr/Pgam1/Nadk2/G6pd/Pfkm/Ndufa9	37
GO:1901293	GO:1901293	nucleoside phosphate biosynthetic process	36/389	303/16870	5.88722e-16	7.91201e-14	7.0204e-14	Atp5me/Acacb/Pfkl/Pdk1/Atp5po/Atp5f1b/Atp5pd/Adss/Dmac2l/Suclg1/Galk1/Acss1/Dut/Acat1/Pdhb/Nppa/Ada/Papss1/Cyc1/Pgam2/Idh2/Acsl5/Acly/Kars/Dcakd/Nipsnap2/Hk3/Atp5mf/Atp5mg/COX2/Tmsb4x/Atp5f1e/Pgam1/Nadk2/G6pd/Pfkm	36
GO:0009165	GO:0009165	nucleotide biosynthetic process	35/389	299/16870	2.41891e-15	3.13874e-13	2.78503e-13	Atp5me/Acacb/Pfkl/Pdk1/Atp5po/Atp5f1b/Atp5pd/Adss/Dmac2l/Galk1/Acss1/Dut/Acat1/Pdhb/Nppa/Ada/Papss1/Cyc1/Pgam2/Idh2/Acsl5/Acly/Kars/Dcakd/Nipsnap2/Hk3/Atp5mf/Atp5mg/COX2/Tmsb4x/Atp5f1e/Pgam1/Nadk2/G6pd/Pfkm	35
GO:0043648	GO:0043648	dicarboxylic acid metabolic process	22/389	107/16870	3.43455e-15	4.30807e-13	3.82259e-13	Mdh2/Cpox/Fh/Dglucy/Adss/Dlst/Suclg1/Gclc/Adhfe1/Sdhb/Mdh1/Got2/Grhpr/Sdha/Idh2/Acsf3/Me2/Got1/Acly/Sucla2/Aldh5a1/Iffo2	22
GO:0006119	GO:0006119	oxidative phosphorylation	21/389	96/16870	3.91873e-15	4.75683e-13	4.22078e-13	Ndufv3/Atp5po/Tefm/Ndufa8/Ndufa7/Ndufa12/Ndufb9/Ndufs1/Cyc1/Sdha/Ndufb8/Coq9/Ndufv1/Uqcrfs1/LOC679739/Nipsnap2/Uqcrb/COX2/Uqcrc1/Ndufs2/Cox7a2	21
GO:0009152	GO:0009152	purine ribonucleotide biosynthetic process	29/389	216/16870	1.84034e-14	2.16412e-12	1.92025e-12	Atp5me/Acacb/Pfkl/Pdk1/Atp5po/Atp5f1b/Atp5pd/Adss/Dmac2l/Galk1/Acss1/Acat1/Pdhb/Nppa/Papss1/Cyc1/Pgam2/Acsl5/Acly/Dcakd/Nipsnap2/Hk3/Atp5mf/Atp5mg/COX2/Tmsb4x/Atp5f1e/Pgam1/Pfkm	29
GO:0006164	GO:0006164	purine nucleotide biosynthetic process	30/389	234/16870	2.25849e-14	2.57536e-12	2.28515e-12	Atp5me/Acacb/Pfkl/Pdk1/Atp5po/Atp5f1b/Atp5pd/Adss/Dmac2l/Galk1/Acss1/Acat1/Pdhb/Nppa/Ada/Papss1/Cyc1/Pgam2/Acsl5/Acly/Dcakd/Nipsnap2/Hk3/Atp5mf/Atp5mg/COX2/Tmsb4x/Atp5f1e/Pgam1/Pfkm	30
GO:0046390	GO:0046390	ribose phosphate biosynthetic process	30/389	236/16870	2.84413e-14	3.14779e-12	2.79306e-12	Atp5me/Acacb/Pfkl/Pdk1/Atp5po/Atp5f1b/Atp5pd/Adss/Dmac2l/Galk1/Acss1/Acat1/Pdhb/Nppa/Papss1/Cyc1/Pgam2/Acsl5/Acly/Dcakd/Nipsnap2/Hk3/Atp5mf/Atp5mg/COX2/Tmsb4x/Atp5f1e/Pgam1/G6pd/Pfkm	30
GO:0016999	GO:0016999	antibiotic metabolic process	24/389	146/16870	3.70078e-14	3.97887e-12	3.53049e-12	Mdh2/Sod1/Cybb/Fh/Dlst/Suclg1/Acss1/Pdhb/Sdhb/Mdh1/Akr1b1/Prdx3/Sdha/Idh2/Dpep1/Acly/Sucla2/Akr7a2/Ugt1a1/Prdx5/Aldh5a1/Aco2/Cbr4/COX2	24
GO:0072522	GO:0072522	purine-containing compound biosynthetic process	30/389	241/16870	5.0078e-14	5.23454e-12	4.64466e-12	Atp5me/Acacb/Pfkl/Pdk1/Atp5po/Atp5f1b/Atp5pd/Adss/Dmac2l/Galk1/Acss1/Acat1/Pdhb/Nppa/Ada/Papss1/Cyc1/Pgam2/Acsl5/Acly/Dcakd/Nipsnap2/Hk3/Atp5mf/Atp5mg/COX2/Tmsb4x/Atp5f1e/Pgam1/Pfkm	30
GO:0009260	GO:0009260	ribonucleotide biosynthetic process	29/389	229/16870	8.5725e-14	8.71846e-12	7.73598e-12	Atp5me/Acacb/Pfkl/Pdk1/Atp5po/Atp5f1b/Atp5pd/Adss/Dmac2l/Galk1/Acss1/Acat1/Pdhb/Nppa/Papss1/Cyc1/Pgam2/Acsl5/Acly/Dcakd/Nipsnap2/Hk3/Atp5mf/Atp5mg/COX2/Tmsb4x/Atp5f1e/Pgam1/Pfkm	29
GO:0042773	GO:0042773	ATP synthesis coupled electron transport	17/389	66/16870	9.33624e-14	9.24533e-12	8.20347e-12	Ndufv3/Ndufa8/Ndufa7/Ndufa12/Ndufb9/Ndufs1/Cyc1/Sdha/Ndufb8/Coq9/Ndufv1/Uqcrfs1/LOC679739/Uqcrb/COX2/Uqcrc1/Ndufs2	17
GO:0006635	GO:0006635	fatty acid beta-oxidation	17/389	69/16870	2.07793e-13	2.00494e-11	1.779e-11	Acacb/Acads/Acat1/Decr1/Ivd/Etfdh/Hadh/Auh/Fabp3/Acadl/Acaa2/Etfa/Acsl5/Etfb/Hadha/Eci2/Plin5	17
GO:0006520	GO:0006520	cellular amino acid metabolic process	31/389	276/16870	3.13128e-13	2.94575e-11	2.61379e-11	Plod3/Cpox/Gfpt2/Qdpr/Dglucy/Adss/Dlst/Gclc/Adhfe1/Plod1/Acat1/Hibadh/Ivd/Bckdhb/Nars2/Auh/Got2/Mccc1/Pccb/Dpep1/Got1/Kars/Bckdk/Aldh5a1/Mri1/Plod2/P4hb/Gstz1/P4ha1/Mut/Iffo2	31
GO:0090407	GO:0090407	organophosphate biosynthetic process	42/389	500/16870	4.11098e-13	3.77308e-11	3.34789e-11	Atp5me/Acacb/Pfkl/Pdk1/Atp5po/Atp5f1b/Phka1/Atp5pd/Adss/Dmac2l/Suclg1/Galk1/Acss1/Dut/Acat1/Pdhb/Nppa/Ada/Papss1/Cyc1/Fabp3/Pgam2/Idh2/Acsl5/Ckm/Acly/Ndufab1/Slc27a1/Kars/Dcakd/Nipsnap2/Hk3/Atp5mf/Fitm2/Atp5mg/COX2/Tmsb4x/Atp5f1e/Pgam1/Nadk2/G6pd/Pfkm	42
GO:0072329	GO:0072329	monocarboxylic acid catabolic process	20/389	112/16870	1.04247e-12	9.34008e-11	8.28754e-11	Acacb/Acads/Acat1/Decr1/Ivd/Etfdh/Hadh/Auh/Fabp3/Acadl/Acaa2/Etfa/Pccb/Acsl5/Etfb/Ldhd/Aldh5a1/Hadha/Eci2/Plin5	20
GO:0051188	GO:0051188	cofactor biosynthetic process	28/389	235/16870	1.0696e-12	9.36022e-11	8.30542e-11	Acacb/Pfkl/Pdk1/Cpox/Sod1/Qdpr/Cybb/Gclc/Galk1/Sptb/Acss1/Acat1/Pdhb/Coq3/Pgam2/Idh2/Coq9/Acsl5/Acly/Dcakd/Hk3/Coq10a/COX2/Pgam1/Nadk2/G6pd/Pfkm/Ndufa9	28
GO:1901605	GO:1901605	alpha-amino acid metabolic process	26/389	205/16870	1.65228e-12	1.41307e-10	1.25383e-10	Plod3/Cpox/Gfpt2/Qdpr/Dglucy/Adss/Dlst/Gclc/Adhfe1/Plod1/Acat1/Hibadh/Ivd/Auh/Got2/Mccc1/Dpep1/Got1/Aldh5a1/Mri1/Plod2/P4hb/Gstz1/P4ha1/Mut/Iffo2	26
GO:0006631	GO:0006631	fatty acid metabolic process	34/389	361/16870	3.43823e-12	2.87513e-10	2.55113e-10	Acacb/Prkab1/Acads/Pdk1/Acsf2/Acss1/Acot11/Acat1/Decr1/Ivd/Etfdh/Hadh/Auh/Fabp3/Acadl/Acaa2/Acsf3/Etfa/Pccb/Zadh2/Acsl5/Acly/Anxa1/Etfb/Ndufab1/Slc27a1/Ugt1a1/Aldh5a1/Cbr4/Hadha/Eci2/Pam/Plin5/Pecr	34
GO:0009062	GO:0009062	fatty acid catabolic process	18/389	95/16870	5.04318e-12	4.12554e-10	3.66063e-10	Acacb/Acads/Acat1/Decr1/Ivd/Etfdh/Hadh/Auh/Fabp3/Acadl/Acaa2/Etfa/Pccb/Acsl5/Etfb/Hadha/Eci2/Plin5	18
GO:0006733	GO:0006733	oxidoreduction coenzyme metabolic process	22/389	151/16870	5.41039e-12	4.33176e-10	3.84362e-10	Pfkl/Mdh2/Dlst/Galk1/Mdh1/Coq3/Ldhb/Pgam2/Idh2/Me2/Coq9/Naxe/Prdx5/Hk3/Coq10a/Fmo1/Dcxr/Pgam1/Nadk2/G6pd/Pfkm/Ndufa9	22
GO:0006101	GO:0006101	citrate metabolic process	12/389	34/16870	6.62536e-12	5.19401e-10	4.60869e-10	Mdh2/Fh/Dlst/Suclg1/Pdhb/Sdhb/Mdh1/Sdha/Idh2/Acly/Sucla2/Aco2	12
GO:0042775	GO:0042775	mitochondrial ATP synthesis coupled electron transport	15/389	62/16870	7.35279e-12	5.64664e-10	5.01032e-10	Ndufv3/Ndufa8/Ndufa7/Ndufa12/Ndufb9/Cyc1/Sdha/Ndufb8/Coq9/Ndufv1/Uqcrfs1/LOC679739/Uqcrb/Uqcrc1/Ndufs2	15
GO:0007005	GO:0007005	mitochondrion organization	36/389	434/16870	3.10072e-11	2.31629e-09	2.05526e-09	Ndufb4/Hsd17b10/Mtfp1/Ndufa8/Ndufa5/Gclc/Synj2bp/Ywhaz/Ndufb11/Ndufb9/Slc25a4/Prdx3/Ndufs4/Ndufs1/Ndufb5/Samm50/Chchd3/Acaa2/Ndufb8/Ndufb10/Timm21/Cnp/Ndufa2/Afg3l2/Ndufab1/Rab3a/Pycard/Dmac2/Ndufa13/Bax/Uqcrb/Ndufb7/Cox7a2/Uqcc1/Ndufa3/Ndufa9	36
GO:0006099	GO:0006099	tricarboxylic acid cycle	11/389	30/16870	3.13927e-11	2.31629e-09	2.05526e-09	Mdh2/Fh/Dlst/Suclg1/Pdhb/Sdhb/Mdh1/Sdha/Idh2/Sucla2/Aco2	11
GO:0008154	GO:0008154	actin polymerization or depolymerization	24/389	200/16870	3.97133e-11	2.87387e-09	2.55001e-09	Actr3/Arf6/Actr2/Dstnl1/Sptb/Arpc3/Swap70/Mtpn/Cyfip1/Capza1/Arpc2/Prkcd/Coro1a/Pycard/Diaph1/Cfl1/Twf1/Rasa1/Abi1/Nckap1l/Hcls1/Tmsb4x/Myadm/Lima1	24
GO:0072350	GO:0072350	tricarboxylic acid metabolic process	12/389	39/16870	4.25795e-11	3.02315e-09	2.68247e-09	Mdh2/Fh/Dlst/Suclg1/Pdhb/Sdhb/Mdh1/Sdha/Idh2/Acly/Sucla2/Aco2	12
GO:0019395	GO:0019395	fatty acid oxidation	17/389	95/16870	5.16901e-11	3.60203e-09	3.19612e-09	Acacb/Acads/Acat1/Decr1/Ivd/Etfdh/Hadh/Auh/Fabp3/Acadl/Acaa2/Etfa/Acsl5/Etfb/Hadha/Eci2/Plin5	17
GO:0008064	GO:0008064	regulation of actin polymerization or depolymerization	22/389	171/16870	6.66676e-11	4.56127e-09	4.04726e-09	Actr3/Arf6/Actr2/Dstnl1/Sptb/Arpc3/Swap70/Mtpn/Cyfip1/Capza1/Arpc2/Prkcd/Coro1a/Pycard/Cfl1/Twf1/Rasa1/Nckap1l/Hcls1/Tmsb4x/Myadm/Lima1	22
GO:0034440	GO:0034440	lipid oxidation	17/389	97/16870	7.30226e-11	4.90686e-09	4.3539e-09	Acacb/Acads/Acat1/Decr1/Ivd/Etfdh/Hadh/Auh/Fabp3/Acadl/Acaa2/Etfa/Acsl5/Etfb/Hadha/Eci2/Plin5	17
GO:0009127	GO:0009127	purine nucleoside monophosphate biosynthetic process	20/389	141/16870	8.35589e-11	5.35532e-09	4.75183e-09	Atp5me/Pfkl/Atp5po/Atp5f1b/Atp5pd/Adss/Dmac2l/Galk1/Ada/Cyc1/Pgam2/Nipsnap2/Hk3/Atp5mf/Atp5mg/COX2/Tmsb4x/Atp5f1e/Pgam1/Pfkm	20
GO:0009168	GO:0009168	purine ribonucleoside monophosphate biosynthetic process	20/389	141/16870	8.35589e-11	5.35532e-09	4.75183e-09	Atp5me/Pfkl/Atp5po/Atp5f1b/Atp5pd/Adss/Dmac2l/Galk1/Ada/Cyc1/Pgam2/Nipsnap2/Hk3/Atp5mf/Atp5mg/COX2/Tmsb4x/Atp5f1e/Pgam1/Pfkm	20
GO:0030832	GO:0030832	regulation of actin filament length	22/389	173/16870	8.39659e-11	5.35532e-09	4.75183e-09	Actr3/Arf6/Actr2/Dstnl1/Sptb/Arpc3/Swap70/Mtpn/Cyfip1/Capza1/Arpc2/Prkcd/Coro1a/Pycard/Cfl1/Twf1/Rasa1/Nckap1l/Hcls1/Tmsb4x/Myadm/Lima1	22
GO:0006754	GO:0006754	ATP biosynthetic process	18/389	116/16870	1.63935e-10	1.02815e-08	9.12285e-09	Atp5me/Pfkl/Atp5po/Atp5f1b/Atp5pd/Dmac2l/Galk1/Cyc1/Pgam2/Nipsnap2/Hk3/Atp5mf/Atp5mg/COX2/Tmsb4x/Atp5f1e/Pgam1/Pfkm	18
GO:0009124	GO:0009124	nucleoside monophosphate biosynthetic process	21/389	164/16870	1.99318e-10	1.22956e-08	1.091e-08	Atp5me/Pfkl/Atp5po/Atp5f1b/Atp5pd/Adss/Dmac2l/Galk1/Dut/Ada/Cyc1/Pgam2/Nipsnap2/Hk3/Atp5mf/Atp5mg/COX2/Tmsb4x/Atp5f1e/Pgam1/Pfkm	21
GO:0009108	GO:0009108	coenzyme biosynthetic process	22/389	183/16870	2.53467e-10	1.53838e-08	1.36502e-08	Acacb/Pfkl/Pdk1/Qdpr/Galk1/Acss1/Acat1/Pdhb/Coq3/Pgam2/Idh2/Coq9/Acsl5/Acly/Dcakd/Hk3/Coq10a/Pgam1/Nadk2/G6pd/Pfkm/Ndufa9	22
GO:0009156	GO:0009156	ribonucleoside monophosphate biosynthetic process	20/389	153/16870	3.73246e-10	2.2294e-08	1.97817e-08	Atp5me/Pfkl/Atp5po/Atp5f1b/Atp5pd/Adss/Dmac2l/Galk1/Ada/Cyc1/Pgam2/Nipsnap2/Hk3/Atp5mf/Atp5mg/COX2/Tmsb4x/Atp5f1e/Pgam1/Pfkm	20
GO:0009206	GO:0009206	purine ribonucleoside triphosphate biosynthetic process	18/389	125/16870	5.78423e-10	3.40094e-08	3.01769e-08	Atp5me/Pfkl/Atp5po/Atp5f1b/Atp5pd/Dmac2l/Galk1/Cyc1/Pgam2/Nipsnap2/Hk3/Atp5mf/Atp5mg/COX2/Tmsb4x/Atp5f1e/Pgam1/Pfkm	18
GO:0009145	GO:0009145	purine nucleoside triphosphate biosynthetic process	18/389	126/16870	6.60767e-10	3.82534e-08	3.39426e-08	Atp5me/Pfkl/Atp5po/Atp5f1b/Atp5pd/Dmac2l/Galk1/Cyc1/Pgam2/Nipsnap2/Hk3/Atp5mf/Atp5mg/COX2/Tmsb4x/Atp5f1e/Pgam1/Pfkm	18
GO:0009063	GO:0009063	cellular amino acid catabolic process	16/389	97/16870	6.79472e-10	3.87402e-08	3.43746e-08	Qdpr/Dlst/Adhfe1/Acat1/Hibadh/Ivd/Bckdhb/Auh/Got2/Mccc1/Pccb/Got1/Bckdk/Aldh5a1/Gstz1/Iffo2	16
GO:0009142	GO:0009142	nucleoside triphosphate biosynthetic process	19/389	142/16870	6.90868e-10	3.8802e-08	3.44294e-08	Atp5me/Pfkl/Atp5po/Atp5f1b/Atp5pd/Dmac2l/Suclg1/Galk1/Cyc1/Pgam2/Nipsnap2/Hk3/Atp5mf/Atp5mg/COX2/Tmsb4x/Atp5f1e/Pgam1/Pfkm	19
GO:0006790	GO:0006790	sulfur compound metabolic process	26/389	269/16870	7.53762e-10	4.17119e-08	3.70113e-08	Glo1/Acacb/Pdk1/Sod1/Dlst/Suclg1/Gclc/Acss1/Acot11/Acat1/Pdhb/Papss1/Acaa2/Dpep1/Acsl5/Gstk1/Acly/Sucla2/Isca1/Aldh5a1/Mri1/Gsta4/Gstz1/Mut/Bgn/G6pd	26
GO:0009201	GO:0009201	ribonucleoside triphosphate biosynthetic process	18/389	131/16870	1.26099e-09	6.87699e-08	6.10202e-08	Atp5me/Pfkl/Atp5po/Atp5f1b/Atp5pd/Dmac2l/Galk1/Cyc1/Pgam2/Nipsnap2/Hk3/Atp5mf/Atp5mg/COX2/Tmsb4x/Atp5f1e/Pgam1/Pfkm	18
GO:0007015	GO:0007015	actin filament organization	31/389	385/16870	1.59729e-09	8.58656e-08	7.61894e-08	Marcks/Actr3/Arf6/Actr2/Dstnl1/Sptb/Arpc3/Synpo2l/Swap70/Mtpn/Cyfip1/Rhoc/Capza1/Arpc2/Obsl1/Tpm4/Prkcd/Tpm3/Coro1a/Pycard/Diaph1/Cfl1/Twf1/Rasa1/Abi1/Nckap1l/Hcls1/Tmsb4x/Myadm/Actn1/Lima1	31
GO:0030833	GO:0030833	regulation of actin filament polymerization	19/389	151/16870	1.98705e-09	1.05314e-07	9.3446e-08	Actr3/Arf6/Actr2/Sptb/Arpc3/Mtpn/Cyfip1/Capza1/Arpc2/Prkcd/Coro1a/Pycard/Cfl1/Twf1/Rasa1/Nckap1l/Hcls1/Tmsb4x/Myadm	19
GO:0019362	GO:0019362	pyridine nucleotide metabolic process	18/389	135/16870	2.06901e-09	1.06653e-07	9.46344e-08	Pfkl/Mdh2/Dlst/Galk1/Mdh1/Ldhb/Pgam2/Idh2/Me2/Naxe/Prdx5/Hk3/Fmo1/Dcxr/Pgam1/Nadk2/G6pd/Pfkm	18
GO:0046496	GO:0046496	nicotinamide nucleotide metabolic process	18/389	135/16870	2.06901e-09	1.06653e-07	9.46344e-08	Pfkl/Mdh2/Dlst/Galk1/Mdh1/Ldhb/Pgam2/Idh2/Me2/Naxe/Prdx5/Hk3/Fmo1/Dcxr/Pgam1/Nadk2/G6pd/Pfkm	18
GO:0030041	GO:0030041	actin filament polymerization	20/389	169/16870	2.2133e-09	1.12549e-07	9.9866e-08	Actr3/Arf6/Actr2/Sptb/Arpc3/Mtpn/Cyfip1/Capza1/Arpc2/Prkcd/Coro1a/Pycard/Diaph1/Cfl1/Twf1/Rasa1/Nckap1l/Hcls1/Tmsb4x/Myadm	20
GO:0032271	GO:0032271	regulation of protein polymerization	22/389	207/16870	2.69277e-09	1.35105e-07	1.1988e-07	Actr3/Arf6/Actr2/Fkbp4/Sptb/Arpc3/Mapre1/Mtpn/Cyfip1/Vdac2/Capza1/Arpc2/Prkcd/Coro1a/Pycard/Cfl1/Twf1/Rasa1/Nckap1l/Hcls1/Tmsb4x/Myadm	22
GO:0110053	GO:0110053	regulation of actin filament organization	24/389	247/16870	3.0997e-09	1.53476e-07	1.36181e-07	Actr3/Arf6/Actr2/Dstnl1/Sptb/Arpc3/Synpo2l/Swap70/Mtpn/Cyfip1/Rhoc/Capza1/Arpc2/Prkcd/Coro1a/Pycard/Cfl1/Twf1/Rasa1/Nckap1l/Hcls1/Tmsb4x/Myadm/Lima1	24
GO:0072524	GO:0072524	pyridine-containing compound metabolic process	18/389	140/16870	3.74612e-09	1.83073e-07	1.62443e-07	Pfkl/Mdh2/Dlst/Galk1/Mdh1/Ldhb/Pgam2/Idh2/Me2/Naxe/Prdx5/Hk3/Fmo1/Dcxr/Pgam1/Nadk2/G6pd/Pfkm	18
GO:1902903	GO:1902903	regulation of supramolecular fiber organization	28/389	340/16870	6.18899e-09	2.98579e-07	2.64932e-07	Actr3/Arf6/Actr2/Dstnl1/Fkbp4/Sptb/Arpc3/Synpo2l/Swap70/Mapre1/Mtpn/Cyfip1/Rhoc/Capza1/Map1a/Arpc2/Prkcd/Mylk3/Coro1a/Pycard/Cfl1/Twf1/Rasa1/Nckap1l/Hcls1/Tmsb4x/Myadm/Lima1	28
GO:0032970	GO:0032970	regulation of actin filament-based process	29/389	369/16870	9.45479e-09	4.50359e-07	3.99608e-07	Actr3/Arf6/Actr2/Dstnl1/Sptb/Atp1a2/Arpc3/Synpo2l/Swap70/Mtpn/Cyfip1/Rhoc/Capza1/Arpc2/Prkcd/Mylk3/Coro1a/Pycard/Cfl1/Twf1/Rasa1/Pam/Nckap1l/Hcls1/Cnn2/Tmsb4x/Abracl/Myadm/Lima1	29
GO:0009060	GO:0009060	aerobic respiration	13/389	74/16870	1.25061e-08	5.88258e-07	5.21967e-07	Mdh2/Fh/Dlst/Suclg1/Pdhb/Sdhb/Mdh1/Sdha/Idh2/Sucla2/Aco2/Uqcrb/Uqcrc1	13
GO:0044242	GO:0044242	cellular lipid catabolic process	20/389	188/16870	1.41199e-08	6.55966e-07	5.82045e-07	Acacb/Acads/Acat1/Naga/Decr1/Ivd/Etfdh/Hadh/Auh/Fabp3/Acadl/Acaa2/Etfa/Pccb/Acsl5/Prkcd/Etfb/Hadha/Eci2/Plin5	20
GO:0009083	GO:0009083	branched-chain amino acid catabolic process	7/389	15/16870	1.80244e-08	8.27146e-07	7.33935e-07	Acat1/Hibadh/Ivd/Bckdhb/Auh/Mccc1/Bckdk	7
GO:0032956	GO:0032956	regulation of actin cytoskeleton organization	26/389	322/16870	3.26778e-08	1.48152e-06	1.31457e-06	Actr3/Arf6/Actr2/Dstnl1/Sptb/Arpc3/Synpo2l/Swap70/Mtpn/Cyfip1/Rhoc/Capza1/Arpc2/Prkcd/Mylk3/Coro1a/Pycard/Cfl1/Twf1/Rasa1/Pam/Nckap1l/Hcls1/Tmsb4x/Myadm/Lima1	26
GO:0033539	GO:0033539	fatty acid beta-oxidation using acyl-CoA dehydrogenase	6/389	11/16870	6.06111e-08	2.71523e-06	2.40925e-06	Acads/Ivd/Etfdh/Acadl/Etfa/Etfb	6
GO:0051258	GO:0051258	protein polymerization	23/389	268/16870	6.82027e-08	3.01937e-06	2.67912e-06	Actr3/Arf6/Actr2/Fkbp4/Sptb/Arpc3/Mapre1/Mtpn/Cyfip1/Vdac2/Capza1/Arpc2/Prkcd/Coro1a/Pycard/Diaph1/Cfl1/Twf1/Rasa1/Nckap1l/Hcls1/Tmsb4x/Myadm	23
GO:0032272	GO:0032272	negative regulation of protein polymerization	12/389	71/16870	7.16688e-08	3.13593e-06	2.78254e-06	Fkbp4/Sptb/Mapre1/Mtpn/Vdac2/Capza1/Arpc2/Prkcd/Cfl1/Twf1/Tmsb4x/Myadm	12
GO:0009081	GO:0009081	branched-chain amino acid metabolic process	7/389	19/16870	1.30302e-07	5.63595e-06	5.00084e-06	Acat1/Hibadh/Ivd/Bckdhb/Auh/Mccc1/Bckdk	7
GO:0046394	GO:0046394	carboxylic acid biosynthetic process	26/389	346/16870	1.37449e-07	5.8775e-06	5.21516e-06	Acacb/Prkab1/Pfkl/Plod3/Ugdh/Lta4h/Galk1/Acss1/Plod1/Acot11/Got2/Acadl/Pgam2/Rbp1/Acsf3/Got1/Acly/Anxa1/Ndufab1/Cbr4/Mri1/Hk3/Plod2/Pgam1/Pecr/Pfkm	26
GO:0033865	GO:0033865	nucleoside bisphosphate metabolic process	14/389	106/16870	1.46824e-07	6.0714e-06	5.38722e-06	Acacb/Pdk1/Dlst/Suclg1/Acss1/Acot11/Acat1/Pdhb/Papss1/Acaa2/Acsl5/Acly/Sucla2/Dcakd	14
GO:0033875	GO:0033875	ribonucleoside bisphosphate metabolic process	14/389	106/16870	1.46824e-07	6.0714e-06	5.38722e-06	Acacb/Pdk1/Dlst/Suclg1/Acss1/Acot11/Acat1/Pdhb/Papss1/Acaa2/Acsl5/Acly/Sucla2/Dcakd	14
GO:0034032	GO:0034032	purine nucleoside bisphosphate metabolic process	14/389	106/16870	1.46824e-07	6.0714e-06	5.38722e-06	Acacb/Pdk1/Dlst/Suclg1/Acss1/Acot11/Acat1/Pdhb/Papss1/Acaa2/Acsl5/Acly/Sucla2/Dcakd	14
GO:0016053	GO:0016053	organic acid biosynthetic process	26/389	348/16870	1.53944e-07	6.29665e-06	5.58708e-06	Acacb/Prkab1/Pfkl/Plod3/Ugdh/Lta4h/Galk1/Acss1/Plod1/Acot11/Got2/Acadl/Pgam2/Rbp1/Acsf3/Got1/Acly/Anxa1/Ndufab1/Cbr4/Mri1/Hk3/Plod2/Pgam1/Pecr/Pfkm	26
GO:0015985	GO:0015985	energy coupled proton transport, down electrochemical gradient	7/389	20/16870	1.96505e-07	7.86647e-06	6.97999e-06	Atp5me/Atp5po/Atp5f1b/Atp5pd/Cyc1/Atp5mg/Atp5f1e	7
GO:0015986	GO:0015986	ATP synthesis coupled proton transport	7/389	20/16870	1.96505e-07	7.86647e-06	6.97999e-06	Atp5me/Atp5po/Atp5f1b/Atp5pd/Cyc1/Atp5mg/Atp5f1e	7
GO:0016042	GO:0016042	lipid catabolic process	23/389	289/16870	2.66986e-07	1.05755e-05	9.38371e-06	Acacb/Acads/Acat1/Naga/Decr1/Plbd1/Ivd/Etfdh/Hadh/Auh/Ppt1/Fabp3/Acadl/Acaa2/Etfa/Pccb/Acsl5/Prkcd/Etfb/Ugt1a1/Hadha/Eci2/Plin5	23
GO:0042180	GO:0042180	cellular ketone metabolic process	18/389	186/16870	3.16955e-07	1.2424e-05	1.10239e-05	Glo1/Acacb/Pdk1/Akr1b1/Coq3/Got2/Fabp3/Acadl/Coq9/Acsl5/Anxa1/Akr7a2/Dhrs4/Ugt1a1/Cbr4/Coq10a/Plin5/Ndufa9	18
GO:0006575	GO:0006575	cellular modified amino acid metabolic process	17/389	167/16870	3.28302e-07	1.27361e-05	1.13008e-05	Glo1/Plod3/Sod1/Gclc/Plod1/Acadl/Gstk1/Ckm/Slc27a1/Aldh5a1/Mri1/Plod2/Gsta4/P4hb/Gstz1/P4ha1/G6pd	17
GO:1901606	GO:1901606	alpha-amino acid catabolic process	12/389	84/16870	4.83005e-07	1.85464e-05	1.64564e-05	Qdpr/Dlst/Adhfe1/Acat1/Hibadh/Ivd/Auh/Got2/Mccc1/Got1/Gstz1/Iffo2	12
GO:0051260	GO:0051260	protein homooligomerization	26/389	370/16870	5.04982e-07	1.91944e-05	1.70314e-05	Marcks/Acacb/Acads/Pfkl/Hsd17b10/Dut/Gsdmd/Acat1/Decr1/Ivd/Dync1li1/Thbs4/Rhoc/Tgm2/Acadl/Entpd2/Hmox1/Atxn10/Naxe/Pycard/Bax/Aldh5a1/Cbr4/Pam/Dcxr/Pfkm	26
GO:0006637	GO:0006637	acyl-CoA metabolic process	12/389	85/16870	5.50864e-07	2.05238e-05	1.8211e-05	Acacb/Pdk1/Dlst/Suclg1/Acss1/Acot11/Acat1/Pdhb/Acaa2/Acsl5/Acly/Sucla2	12
GO:0035383	GO:0035383	thioester metabolic process	12/389	85/16870	5.50864e-07	2.05238e-05	1.8211e-05	Acacb/Pdk1/Dlst/Suclg1/Acss1/Acot11/Acat1/Pdhb/Acaa2/Acsl5/Acly/Sucla2	12
GO:0033866	GO:0033866	nucleoside bisphosphate biosynthetic process	9/389	44/16870	5.83367e-07	2.09781e-05	1.86141e-05	Acacb/Pdk1/Acss1/Acat1/Pdhb/Papss1/Acsl5/Acly/Dcakd	9
GO:0034030	GO:0034030	ribonucleoside bisphosphate biosynthetic process	9/389	44/16870	5.83367e-07	2.09781e-05	1.86141e-05	Acacb/Pdk1/Acss1/Acat1/Pdhb/Papss1/Acsl5/Acly/Dcakd	9
GO:0034033	GO:0034033	purine nucleoside bisphosphate biosynthetic process	9/389	44/16870	5.83367e-07	2.09781e-05	1.86141e-05	Acacb/Pdk1/Acss1/Acat1/Pdhb/Papss1/Acsl5/Acly/Dcakd	9
GO:0006120	GO:0006120	mitochondrial electron transport, NADH to ubiquinone	7/389	23/16870	5.85358e-07	2.09781e-05	1.86141e-05	Ndufa8/Ndufa7/Ndufb9/Ndufb8/Coq9/Ndufv1/LOC679739	7
GO:0006739	GO:0006739	NADP metabolic process	8/389	33/16870	6.23345e-07	2.21288e-05	1.96351e-05	Idh2/Me2/Prdx5/Fmo1/Dcxr/Pgam1/Nadk2/G6pd	8
GO:1902904	GO:1902904	negative regulation of supramolecular fiber organization	15/389	139/16870	7.68476e-07	2.70259e-05	2.39804e-05	Fkbp4/Sptb/Swap70/Mapre1/Mtpn/Capza1/Map1a/Arpc2/Prkcd/Coro1a/Cfl1/Twf1/Tmsb4x/Myadm/Lima1	15
GO:0006084	GO:0006084	acetyl-CoA metabolic process	8/389	35/16870	1.01488e-06	3.53609e-05	3.13761e-05	Acacb/Pdk1/Dlst/Acss1/Acat1/Pdhb/Acaa2/Acly	8
GO:0006536	GO:0006536	glutamate metabolic process	8/389	36/16870	1.27879e-06	4.41474e-05	3.91725e-05	Cpox/Dglucy/Gclc/Adhfe1/Got2/Got1/Aldh5a1/Iffo2	8
GO:0051494	GO:0051494	negative regulation of cytoskeleton organization	15/389	145/16870	1.32136e-06	4.52026e-05	4.01088e-05	Fkbp4/Sptb/Swap70/Mapre1/Mtpn/Capza1/Map1a/Arpc2/Prkcd/Coro1a/Cfl1/Twf1/Tmsb4x/Myadm/Lima1	15
GO:0030834	GO:0030834	regulation of actin filament depolymerization	9/389	50/16870	1.82459e-06	6.18551e-05	5.48847e-05	Dstnl1/Sptb/Swap70/Mtpn/Capza1/Arpc2/Cfl1/Twf1/Lima1	9
GO:0006105	GO:0006105	succinate metabolic process	5/389	11/16870	2.61825e-06	8.79684e-05	7.80552e-05	Suclg1/Sdhb/Sdha/Sucla2/Aldh5a1	5
GO:0030258	GO:0030258	lipid modification	18/389	220/16870	3.6455e-06	0.000120506	0.000106926	Acacb/Acads/Acat1/Decr1/Ivd/Etfdh/Hadh/Auh/Fabp3/Acadl/Acaa2/Etfa/Acsl5/Etfb/Impa2/Hadha/Eci2/Plin5	18
GO:0030835	GO:0030835	negative regulation of actin filament depolymerization	8/389	41/16870	3.65072e-06	0.000120506	0.000106926	Sptb/Swap70/Mtpn/Capza1/Arpc2/Cfl1/Twf1/Lima1	8
GO:0030042	GO:0030042	actin filament depolymerization	9/389	55/16870	4.18275e-06	0.000136867	0.000121443	Dstnl1/Sptb/Swap70/Mtpn/Capza1/Arpc2/Cfl1/Twf1/Lima1	9
GO:1901661	GO:1901661	quinone metabolic process	7/389	30/16870	4.22839e-06	0.000137167	0.00012171	Akr1b1/Coq3/Coq9/Akr7a2/Cbr4/Coq10a/Ndufa9	7
GO:0030837	GO:0030837	negative regulation of actin filament polymerization	9/389	56/16870	4.88341e-06	0.000157062	0.000139363	Sptb/Mtpn/Capza1/Arpc2/Prkcd/Cfl1/Twf1/Tmsb4x/Myadm	9
GO:0018208	GO:0018208	peptidyl-proline modification	9/389	57/16870	5.68238e-06	0.000181047	0.000160644	Fkbp3/Fkbp4/Fkbp1a/Fkbp10/Ppib/Ppic/P4hb/P4ha1/P3h1	9
GO:0032535	GO:0032535	regulation of cellular component size	25/389	396/16870	5.72536e-06	0.000181047	0.000160644	Actr3/Rtn4/Arf6/Actr2/Dstnl1/Sptb/Arpc3/Swap70/Aqp1/Mtpn/Cyfip1/Capza1/Arpc2/Prkcd/Picalm/Coro1a/Pycard/Cfl1/Twf1/Rasa1/Nckap1l/Hcls1/Tmsb4x/Myadm/Lima1	25
GO:0009066	GO:0009066	aspartate family amino acid metabolic process	8/389	44/16870	6.37476e-06	0.000199902	0.000177375	Plod3/Adss/Dlst/Plod1/Got2/Got1/Mri1/Plod2	8
GO:0035384	GO:0035384	thioester biosynthetic process	7/389	32/16870	6.71834e-06	0.000207222	0.00018387	Acacb/Pdk1/Acss1/Acat1/Pdhb/Acsl5/Acly	7
GO:0071616	GO:0071616	acyl-CoA biosynthetic process	7/389	32/16870	6.71834e-06	0.000207222	0.00018387	Acacb/Pdk1/Acss1/Acat1/Pdhb/Acsl5/Acly	7
GO:0006107	GO:0006107	oxaloacetate metabolic process	5/389	13/16870	7.02043e-06	0.000214779	0.000190576	Mdh2/Mdh1/Got2/Got1/Acly	5
GO:1902600	GO:1902600	proton transmembrane transport	14/389	149/16870	9.2013e-06	0.00027923	0.000247763	Atp5me/Atp5po/Atp5f1b/Atp5pd/Atp1a2/Slc25a3/Cox6c/Slc25a4/Cyc1/Atp5mg/COX2/Cox7a2/Tmsb4x/Atp5f1e	14
GO:0042542	GO:0042542	response to hydrogen peroxide	16/389	192/16870	1.00244e-05	0.000301775	0.000267768	Txnrd2/Sod1/Col1a1/Mb/Akr1b1/Ada/Prdx3/Aqp1/Hmox1/Arpc2/Prkcd/Anxa1/Cfl1/Stat6/Hk3/Cfh	16
GO:0009067	GO:0009067	aspartate family amino acid biosynthetic process	6/389	23/16870	1.04702e-05	0.000310231	0.000275271	Plod3/Plod1/Got2/Got1/Mri1/Plod2	6
GO:0016137	GO:0016137	glycoside metabolic process	6/389	23/16870	1.04702e-05	0.000310231	0.000275271	Gusb/Naga/Fuca1/Akr1b1/Akr7a2/Cbr4	6
GO:0051289	GO:0051289	protein homotetramerization	11/389	95/16870	1.17201e-05	0.000344554	0.000305726	Acacb/Acads/Pfkl/Hsd17b10/Decr1/Acadl/Naxe/Aldh5a1/Cbr4/Dcxr/Pfkm	11
GO:1902905	GO:1902905	positive regulation of supramolecular fiber organization	16/389	195/16870	1.21888e-05	0.000355553	0.000315486	Actr3/Arf6/Actr2/Dstnl1/Arpc3/Synpo2l/Swap70/Mapre1/Cyfip1/Rhoc/Arpc2/Mylk3/Coro1a/Pycard/Cfl1/Nckap1l	16
GO:0045454	GO:0045454	cell redox homeostasis	9/389	63/16870	1.3234e-05	0.000383073	0.000339904	Txnrd2/Txn2/Gclc/Txndc12/Prdx3/Pdia3/Sh3bgrl3/Prdx5/P4hb	9
GO:0072330	GO:0072330	monocarboxylic acid biosynthetic process	18/389	244/16870	1.52652e-05	0.000438495	0.000389081	Acacb/Prkab1/Pfkl/Galk1/Acss1/Acot11/Acadl/Pgam2/Rbp1/Acsf3/Acly/Anxa1/Ndufab1/Cbr4/Hk3/Pgam1/Pecr/Pfkm	18
GO:0006749	GO:0006749	glutathione metabolic process	8/389	50/16870	1.71152e-05	0.000487912	0.00043293	Glo1/Sod1/Gclc/Gstk1/Aldh5a1/Gsta4/Gstz1/G6pd	8
GO:0044272	GO:0044272	sulfur compound biosynthetic process	10/389	85/16870	2.54165e-05	0.000719115	0.000638078	Acacb/Pdk1/Gclc/Acss1/Acat1/Pdhb/Papss1/Acsl5/Acly/Mri1	10
GO:1901879	GO:1901879	regulation of protein depolymerization	10/389	87/16870	3.11953e-05	0.000871808	0.000773564	Dstnl1/Sptb/Swap70/Mtpn/Capza1/Map1a/Arpc2/Cfl1/Twf1/Lima1	10
GO:0006085	GO:0006085	acetyl-CoA biosynthetic process	5/389	17/16870	3.12767e-05	0.000871808	0.000773564	Pdk1/Acss1/Acat1/Pdhb/Acly	5
GO:0009064	GO:0009064	glutamine family amino acid metabolic process	9/389	71/16870	3.54056e-05	0.000973503	0.000863799	Cpox/Gfpt2/Dglucy/Gclc/Adhfe1/Got2/Got1/Aldh5a1/Iffo2	9
GO:0018126	GO:0018126	protein hydroxylation	6/389	28/16870	3.54424e-05	0.000973503	0.000863799	Plod3/Plod1/Plod2/P4hb/P4ha1/P3h1	6
GO:1901880	GO:1901880	negative regulation of protein depolymerization	9/389	73/16870	4.43208e-05	0.00120855	0.00107235	Sptb/Swap70/Mtpn/Capza1/Map1a/Arpc2/Cfl1/Twf1/Lima1	9
GO:0043244	GO:0043244	regulation of protein complex disassembly	11/389	111/16870	5.11299e-05	0.00138419	0.0012282	Dstnl1/Fyco1/Sptb/Swap70/Mtpn/Capza1/Map1a/Arpc2/Cfl1/Twf1/Lima1	11
GO:0051495	GO:0051495	positive regulation of cytoskeleton organization	16/389	220/16870	5.36149e-05	0.00144109	0.0012787	Actr3/Arf6/Actr2/Dstnl1/Arpc3/Synpo2l/Swap70/Mapre1/Cyfip1/Rhoc/Arpc2/Mylk3/Coro1a/Pycard/Cfl1/Nckap1l	16
GO:0006103	GO:0006103	2-oxoglutarate metabolic process	5/389	19/16870	5.65775e-05	0.00150994	0.00133978	Dlst/Adhfe1/Got2/Idh2/Got1	5
GO:0019674	GO:0019674	NAD metabolic process	7/389	44/16870	6.02813e-05	0.00159746	0.00141744	Pfkl/Mdh2/Dlst/Mdh1/Ldhb/Nadk2/Pfkm	7
GO:0032963	GO:0032963	collagen metabolic process	10/389	94/16870	6.11132e-05	0.00160817	0.00142695	Plod3/Col1a1/Plod1/Ctsb/Prkcd/Got1/Vim/Prdx5/Plod2/P3h1	10
GO:0005996	GO:0005996	monosaccharide metabolic process	17/389	249/16870	6.95764e-05	0.00181817	0.00161328	Acacb/Pfkl/Pdk1/Gclc/Galk1/Pdhb/Fuca1/Akr1b1/Pgam2/Sord/Ugt1a1/Aldh5a1/Adpgk/Hk3/Dcxr/G6pd/Pfkm	17
GO:0043254	GO:0043254	regulation of protein complex assembly	24/389	433/16870	7.21277e-05	0.00187184	0.0016609	Actr3/Arf6/Actr2/Fkbp4/Sptb/Arpc3/Mapre1/Mtpn/Cyfip1/Rhoc/Vdac2/Capza1/Arpc2/Prkcd/Coro1a/Pycard/Cfl1/Bax/Twf1/Rasa1/Nckap1l/Hcls1/Tmsb4x/Myadm	24
GO:0019400	GO:0019400	alditol metabolic process	5/389	20/16870	7.40157e-05	0.0018947	0.00168119	Galk1/Akr1b1/Coq3/Got1/Sord	5
GO:0051016	GO:0051016	barbed-end actin filament capping	5/389	20/16870	7.40157e-05	0.0018947	0.00168119	Mtpn/Capza1/Arpc2/Cfl1/Twf1	5
GO:0071260	GO:0071260	cellular response to mechanical stimulus	11/389	116/16870	7.66479e-05	0.00194883	0.00172921	Col1a1/Gclc/Atp1a2/Nppa/Ctsb/Aqp1/Mtpn/Got1/Ankrd1/Chek1/Cnn2	11
GO:0031333	GO:0031333	negative regulation of protein complex assembly	12/389	138/16870	8.52332e-05	0.00215257	0.00190999	Fkbp4/Sptb/Mapre1/Mtpn/Vdac2/Capza1/Arpc2/Prkcd/Cfl1/Twf1/Tmsb4x/Myadm	12
GO:0043242	GO:0043242	negative regulation of protein complex disassembly	9/389	80/16870	9.18827e-05	0.00230503	0.00204528	Sptb/Swap70/Mtpn/Capza1/Map1a/Arpc2/Cfl1/Twf1/Lima1	9
GO:0051262	GO:0051262	protein tetramerization	13/389	164/16870	0.000112779	0.00281052	0.0024938	Acacb/Acads/Pfkl/Hsd17b10/Decr1/Anxa2/Acadl/Dhrs4/Naxe/Aldh5a1/Cbr4/Dcxr/Pfkm	13
GO:0097237	GO:0097237	cellular response to toxic substance	18/389	287/16870	0.000127032	0.00314487	0.00279047	Txnrd2/Sod1/Cybb/Akr1b1/Prdx3/Aqp1/Hmox1/Arpc2/Prkcd/Gstk1/Anxa1/Ugt1a1/Cfl1/Prdx5/Stat6/Hk3/Cfh/Actb	18
GO:0000302	GO:0000302	response to reactive oxygen species	18/389	290/16870	0.000144686	0.00355852	0.00315751	Txnrd2/Sod1/Col1a1/Mb/Akr1b1/Ada/Prdx3/Aqp1/Hmox1/Arpc2/Dpep1/Prkcd/Anxa1/Cfl1/Prdx5/Stat6/Hk3/Cfh	18
GO:2000482	GO:2000482	regulation of interleukin-8 secretion	5/389	23/16870	0.000151741	0.0037078	0.00328997	Anxa1/Cd14/Anxa4/Pycard/Tmsb4x	5
GO:0051693	GO:0051693	actin filament capping	6/389	36/16870	0.000156818	0.00380714	0.00337811	Sptb/Mtpn/Capza1/Arpc2/Cfl1/Twf1	6
GO:0043649	GO:0043649	dicarboxylic acid catabolic process	4/389	13/16870	0.000168754	0.00407066	0.00361194	Adhfe1/Got2/Acsf3/Got1	4
GO:0097581	GO:0097581	lamellipodium organization	9/389	87/16870	0.000176415	0.00422834	0.00375185	Actr3/Srgap2/Aqp1/Cyfip1/Arpc2/Snx1/Cfl1/Twf1/Abi1	9
GO:0006633	GO:0006633	fatty acid biosynthetic process	11/389	129/16870	0.000198746	0.00473343	0.00420002	Acacb/Prkab1/Acss1/Acot11/Acadl/Acsf3/Acly/Anxa1/Ndufab1/Cbr4/Pecr	11
GO:0030199	GO:0030199	collagen fibril organization	7/389	53/16870	0.000202943	0.00480297	0.00426173	Plod3/Col1a1/Plod1/Anxa2/Plod2/P4ha1/P3h1	7
GO:0030838	GO:0030838	positive regulation of actin filament polymerization	9/389	89/16870	0.000209968	0.00493819	0.0043817	Actr3/Arf6/Actr2/Arpc3/Cyfip1/Arpc2/Coro1a/Pycard/Nckap1l	9
GO:0042398	GO:0042398	cellular modified amino acid biosynthetic process	6/389	38/16870	0.000213795	0.00496612	0.00440649	Plod3/Gclc/Plod1/Ckm/Slc27a1/Plod2	6
GO:0070670	GO:0070670	response to interleukin-4	6/389	38/16870	0.000213795	0.00496612	0.00440649	Ctsb/Rpl3/Mrc1/Coro1a/Stat6/Tuba1b	6
GO:1901292	GO:1901292	nucleoside phosphate catabolic process	11/389	131/16870	0.000227515	0.00524547	0.00465436	Pfkl/Galk1/Dut/Acat1/Ada/Entpd2/Pgam2/Cnp/Hk3/Pgam1/Pfkm	11
GO:0071364	GO:0071364	cellular response to epidermal growth factor stimulus	7/389	54/16870	0.000228609	0.00524547	0.00465436	Actr3/Col1a1/Ptpn12/Arpc2/Cfl1/Rasa1/Dusp3	7
GO:0006122	GO:0006122	mitochondrial electron transport, ubiquinol to cytochrome c	4/389	14/16870	0.00023197	0.00529033	0.00469416	Cyc1/Uqcrfs1/Uqcrb/Uqcrc1	4
GO:0019359	GO:0019359	nicotinamide nucleotide biosynthetic process	9/389	91/16870	0.000248661	0.00560307	0.00497166	Pfkl/Galk1/Pgam2/Idh2/Hk3/Pgam1/Nadk2/G6pd/Pfkm	9
GO:0019363	GO:0019363	pyridine nucleotide biosynthetic process	9/389	91/16870	0.000248661	0.00560307	0.00497166	Pfkl/Galk1/Pgam2/Idh2/Hk3/Pgam1/Nadk2/G6pd/Pfkm	9
GO:0006734	GO:0006734	NADH metabolic process	5/389	26/16870	0.000280231	0.00627684	0.00556951	Pfkl/Mdh2/Dlst/Mdh1/Pfkm	5
GO:0000413	GO:0000413	protein peptidyl-prolyl isomerization	6/389	40/16870	0.000285938	0.00636678	0.00564931	Fkbp3/Fkbp4/Fkbp1a/Fkbp10/Ppib/Ppic	6
GO:0009266	GO:0009266	response to temperature stimulus	15/389	231/16870	0.000316326	0.00700198	0.00621292	Sod1/Rbm3/Gclc/Hspa2/Acot11/Acadl/Hmox1/Prkcd/Ckm/Cd14/Slc27a1/Clpb/Tgfb1i1/Hspb7/COX2	15
GO:0072606	GO:0072606	interleukin-8 secretion	5/389	27/16870	0.000337466	0.00742623	0.00658937	Anxa1/Cd14/Anxa4/Pycard/Tmsb4x	5
GO:0072525	GO:0072525	pyridine-containing compound biosynthetic process	9/389	95/16870	0.00034389	0.0075236	0.00667576	Pfkl/Galk1/Pgam2/Idh2/Hk3/Pgam1/Nadk2/G6pd/Pfkm	9
GO:0051261	GO:0051261	protein depolymerization	10/389	117/16870	0.000377532	0.00821188	0.00728648	Dstnl1/Sptb/Swap70/Mtpn/Capza1/Map1a/Arpc2/Cfl1/Twf1/Lima1	10
GO:0051881	GO:0051881	regulation of mitochondrial membrane potential	8/389	77/16870	0.00039059	0.00844707	0.00749517	Sod1/Gclc/Prdx3/Ndufs1/Ppa2/Got1/Bax/Clic1	8
GO:0007007	GO:0007007	inner mitochondrial membrane organization	5/389	28/16870	0.000403124	0.0085961	0.00762741	Samm50/Chchd3/Afg3l2/Ndufa13/Bax	5
GO:0006744	GO:0006744	ubiquinone biosynthetic process	4/389	16/16870	0.000406619	0.0085961	0.00762741	Coq3/Coq9/Coq10a/Ndufa9	4
GO:0033631	GO:0033631	cell-cell adhesion mediated by integrin	4/389	16/16870	0.000406619	0.0085961	0.00762741	Swap70/Ada/Fermt3/Itga5	4
GO:1901663	GO:1901663	quinone biosynthetic process	4/389	16/16870	0.000406619	0.0085961	0.00762741	Coq3/Coq9/Coq10a/Ndufa9	4
GO:0046434	GO:0046434	organophosphate catabolic process	13/389	187/16870	0.00041079	0.00861702	0.00764597	Pfkl/Galk1/Dut/Acat1/Ada/Entpd2/Pgam2/Prkcd/Cnp/Impa2/Hk3/Pgam1/Pfkm	13
GO:0034599	GO:0034599	cellular response to oxidative stress	18/389	316/16870	0.000412188	0.00861702	0.00764597	Pdk1/Sod1/Akr1b1/Prdx3/Aqp1/Ankrd2/Hmox1/Arpc2/Dpep1/Prkcd/Anxa1/Cfl1/Prdx5/Stat6/Hk3/Cfh/P4hb/G6pd	18
GO:0045010	GO:0045010	actin nucleation	6/389	43/16870	0.000428492	0.00890836	0.00790448	Actr3/Actr2/Arpc3/Cyfip1/Arpc2/Coro1a	6
GO:0034314	GO:0034314	Arp2/3 complex-mediated actin nucleation	5/389	29/16870	0.000477977	0.00988258	0.00876891	Actr3/Actr2/Arpc3/Cyfip1/Arpc2	5

## Sheet: CC_Prot+RNA
	ID	Description	GeneRatio	BgRatio	pvalue	p.adjust	qvalue	geneID	Count
GO:0005743	GO:0005743	mitochondrial inner membrane	61/390	326/17576	6.95954e-39	2.66488e-36	2.05631e-36	Atp5me/Ndufv3/Cpox/Atp5po/Ndufb4/Atp5f1b/Atp5pd/Mtfp1/Dmac2l/Ndufa8/Ndufa5/Ndufa7/Ndufa12/Sdhb/Slc25a3/Ndufb11/Tmem65/Ndufs3/Ndufb9/Etfdh/Coq3/Lgals3/Cox6c/Slc25a4/Ndufs4/Got2/Ndufs1/Ndufb5/Cyc1/Chchd3/Sdha/Ndufb8/Ndufb10/Timm21/Efhd1/Coq9/Cnp/Ndufa2/Afg3l2/Ndufv1/Ndufab1/Slc27a1/Uqcrfs1/Ldhd/Slc25a42/Dmac2/Ndufa13/LOC679739/Uqcrb/Atp5mf/Ndufb7/Atp5mg/COX2/Uqcrc1/Ndufs2/LOC103693430/Cox7a2/Uqcc1/…	61
GO:0098800	GO:0098800	inner mitochondrial membrane protein complex	44/390	140/17576	1.12919e-38	2.66488e-36	2.05631e-36	Atp5me/Ndufv3/Atp5po/Ndufb4/Atp5f1b/Atp5pd/Ndufa8/Ndufa5/Ndufa7/Ndufa12/Sdhb/Ndufb11/Ndufs3/Ndufb9/Cox6c/Ndufs4/Ndufs1/Ndufb5/Cyc1/Chchd3/Sdha/Ndufb8/Ndufb10/Timm21/Ndufa2/Afg3l2/Ndufv1/Ndufab1/Uqcrfs1/Dmac2/Ndufa13/LOC679739/Uqcrb/Atp5mf/Ndufb7/Atp5mg/COX2/Uqcrc1/Ndufs2/LOC103693430/Cox7a2/Atp5f1e/Ndufa3/Ndufa9	44
GO:1990204	GO:1990204	oxidoreductase complex	39/390	111/17576	1.5729e-36	2.4747e-34	1.90956e-34	Ndufv3/Pdk1/Ndufb4/Cybb/Dlst/Ndufa8/Ndufa5/Ndufa7/Ndufa12/Pdhb/Sdhb/Ndufb11/Ndufs3/Ndufb9/Bckdhb/Ndufs4/Ndufs1/Ndufb5/Cyc1/Sdha/Ndufb8/Ndufb10/Ndufa2/Ndufv1/Ndufab1/Uqcrfs1/Bckdk/Dmac2/Ndufa13/LOC679739/Cbr4/Uqcrb/Ndufb7/Uqcrc1/P4hb/Ndufs2/P4ha1/Ndufa3/Ndufa9	39
GO:0019866	GO:0019866	organelle inner membrane	62/390	375/17576	3.1898e-36	3.76396e-34	2.9044e-34	Atp5me/Ndufv3/Cpox/Atp5po/Ndufb4/Atp5f1b/Atp5pd/Mtfp1/Dmac2l/Ndufa8/Ndufa5/Ndufa7/Ndufa12/Tmem43/Sdhb/Slc25a3/Ndufb11/Tmem65/Ndufs3/Ndufb9/Etfdh/Coq3/Lgals3/Cox6c/Slc25a4/Ndufs4/Got2/Ndufs1/Ndufb5/Cyc1/Chchd3/Sdha/Ndufb8/Ndufb10/Timm21/Efhd1/Coq9/Cnp/Ndufa2/Afg3l2/Ndufv1/Ndufab1/Slc27a1/Uqcrfs1/Ldhd/Slc25a42/Dmac2/Ndufa13/LOC679739/Uqcrb/Atp5mf/Ndufb7/Atp5mg/COX2/Uqcrc1/Ndufs2/LOC103693430/Cox7a2…	62
GO:0044455	GO:0044455	mitochondrial membrane part	50/390	232/17576	5.0384e-35	4.75625e-33	3.67008e-33	Atp5me/Ndufv3/Atp5po/Ndufb4/Atp5f1b/Atp5pd/Ndufa8/Ndufa5/Synj2bp/Ndufa7/Ndufa12/Sdhb/Slc25a3/Ndufb11/Ndufs3/Ndufb9/Etfdh/Coq3/Cox6c/Slc25a4/Ndufs4/Ndufs1/Ndufb5/Samm50/Cyc1/Chchd3/Sdha/Ndufb8/Ndufb10/Timm21/Ndufa2/Afg3l2/Ndufv1/Ndufab1/Uqcrfs1/Dmac2/Ndufa13/LOC679739/Uqcrb/Atp5mf/Ndufb7/Atp5mg/COX2/Uqcrc1/Ndufs2/LOC103693430/Cox7a2/Atp5f1e/Ndufa3/Ndufa9	50
GO:0098798	GO:0098798	mitochondrial protein complex	52/390	268/17576	5.48601e-34	4.31566e-32	3.3301e-32	Atp5me/Ndufv3/Pdk1/Atp5po/Ndufb4/Atp5f1b/Hsd17b10/Atp5pd/Suclg1/Ndufa8/Ndufa5/Ndufa7/Ndufa12/Sdhb/Ndufb11/Ndufs3/Ndufb9/Bckdhb/Cox6c/Ndufs4/Ndufs1/Ndufb5/Samm50/Cyc1/Chchd3/Sdha/Ndufb8/Ndufb10/Timm21/Ndufa2/Afg3l2/Ndufv1/Ndufab1/Uqcrfs1/Bckdk/Dmac2/Ndufa13/Bax/LOC679739/Hadha/Uqcrb/Atp5mf/Ndufb7/Atp5mg/COX2/Uqcrc1/Ndufs2/LOC103693430/Cox7a2/Atp5f1e/Ndufa3/Ndufa9	52
GO:0005746	GO:0005746	mitochondrial respiratory chain	33/390	88/17576	3.79969e-32	2.56208e-30	1.97698e-30	Ndufv3/Ndufb4/Ndufa8/Ndufa5/Ndufa7/Ndufa12/Sdhb/Ndufb11/Ndufs3/Ndufb9/Cox6c/Ndufs4/Ndufs1/Ndufb5/Cyc1/Sdha/Ndufb8/Ndufb10/Ndufa2/Ndufv1/Ndufab1/Uqcrfs1/Dmac2/Ndufa13/LOC679739/Uqcrb/Ndufb7/COX2/Uqcrc1/Ndufs2/Cox7a2/Ndufa3/Ndufa9	33
GO:0098803	GO:0098803	respiratory chain complex	32/390	86/17576	4.49472e-31	2.65189e-29	2.04628e-29	Ndufv3/Ndufb4/Ndufa8/Ndufa5/Ndufa7/Ndufa12/Sdhb/Ndufb11/Ndufs3/Ndufb9/Cox6c/Ndufs4/Ndufs1/Ndufb5/Cyc1/Sdha/Ndufb8/Ndufb10/Ndufa2/Ndufv1/Ndufab1/Uqcrfs1/Dmac2/Ndufa13/LOC679739/Uqcrb/Ndufb7/COX2/Uqcrc1/Ndufs2/Ndufa3/Ndufa9	32
GO:0070469	GO:0070469	respiratory chain	33/390	97/17576	1.64704e-30	8.6378e-29	6.66521e-29	Ndufv3/Ndufb4/Ndufa8/Ndufa5/Ndufa7/Ndufa12/Sdhb/Ndufb11/Ndufs3/Ndufb9/Cox6c/Ndufs4/Ndufs1/Ndufb5/Cyc1/Sdha/Ndufb8/Ndufb10/Ndufa2/Ndufv1/Ndufab1/Uqcrfs1/Dmac2/Ndufa13/LOC679739/Uqcrb/Ndufb7/COX2/Uqcrc1/Ndufs2/Cox7a2/Ndufa3/Ndufa9	33
GO:0005747	GO:0005747	mitochondrial respiratory chain complex I	24/390	54/17576	7.65576e-26	3.01127e-24	2.32359e-24	Ndufv3/Ndufb4/Ndufa8/Ndufa5/Ndufa7/Ndufa12/Ndufb11/Ndufs3/Ndufb9/Ndufs4/Ndufs1/Ndufb5/Ndufb8/Ndufb10/Ndufa2/Ndufv1/Ndufab1/Dmac2/Ndufa13/LOC679739/Ndufb7/Ndufs2/Ndufa3/Ndufa9	24
GO:0030964	GO:0030964	NADH dehydrogenase complex	24/390	54/17576	7.65576e-26	3.01127e-24	2.32359e-24	Ndufv3/Ndufb4/Ndufa8/Ndufa5/Ndufa7/Ndufa12/Ndufb11/Ndufs3/Ndufb9/Ndufs4/Ndufs1/Ndufb5/Ndufb8/Ndufb10/Ndufa2/Ndufv1/Ndufab1/Dmac2/Ndufa13/LOC679739/Ndufb7/Ndufs2/Ndufa3/Ndufa9	24
GO:0045271	GO:0045271	respiratory chain complex I	24/390	54/17576	7.65576e-26	3.01127e-24	2.32359e-24	Ndufv3/Ndufb4/Ndufa8/Ndufa5/Ndufa7/Ndufa12/Ndufb11/Ndufs3/Ndufb9/Ndufs4/Ndufs1/Ndufb5/Ndufb8/Ndufb10/Ndufa2/Ndufv1/Ndufab1/Dmac2/Ndufa13/LOC679739/Ndufb7/Ndufs2/Ndufa3/Ndufa9	24
GO:0043209	GO:0043209	myelin sheath	31/390	215/17576	1.02002e-16	3.70347e-15	2.85772e-15	Mdh2/Atp5po/Sod1/Atp5f1b/Atp5pd/Rtn4/Arf6/Dlst/Hspa2/Atp1a2/Mdh1/Slc25a3/Ndufs3/Akr1b1/Anxa2/Slc25a4/Prdx3/Got2/Ndufs1/Ldhb/Sdha/Vdac2/Pdia3/Sucla2/Cnp/Uqcrfs1/Aco2/Uqcrc1/Actb/Pgam1/Tuba1b	31
GO:0005759	GO:0005759	mitochondrial matrix	31/390	300/17576	1.09441e-12	3.68974e-11	2.84712e-11	Acads/Mdh2/Pdk1/Atp5f1b/Hsd17b10/Tefm/Dglucy/Dlst/Suclg1/Acss1/Acat1/Pdhb/Ivd/Bckdhb/Hadh/Got2/Acadl/Mccc1/Vdac2/Acaa2/Dbt/Etfa/Pccb/Gstk1/Etfb/Ndufab1/Bckdk/Cbr4/Hadha/Ndufa9/Iffo2	31
GO:0045259	GO:0045259	proton-transporting ATP synthase complex	9/390	23/17576	7.38576e-10	2.32405e-08	1.79332e-08	Atp5me/Atp5po/Atp5f1b/Atp5pd/Dmac2l/Atp5mf/Atp5mg/LOC103693430/Atp5f1e	9
GO:0005753	GO:0005753	mitochondrial proton-transporting ATP synthase complex	8/390	22/17576	1.33288e-08	3.932e-07	3.03406e-07	Atp5me/Atp5po/Atp5f1b/Atp5pd/Atp5mf/Atp5mg/LOC103693430/Atp5f1e	8
GO:0015629	GO:0015629	actin cytoskeleton	31/390	445/17576	2.02457e-08	5.62115e-07	4.33746e-07	Marcks/Actr3/Actr2/Dstnl1/Sptb/Arpc3/Synpo2l/Flnb/Cnn3/Mtpn/Ptpn12/Capza1/Arpc2/Obsl1/Tpm4/Parva/Tpm3/Anxa1/Mylk3/Tax1bp3/Coro1a/Cfl1/Fermt3/Twf1/Hspb7/Actb/Cnn2/Myadm/Myl6l/Actn1/Lima1	31
GO:0002102	GO:0002102	podosome	8/390	30/17576	2.08814e-07	5.47556e-06	4.22512e-06	Actr3/Actr2/Ptpn12/Arpc2/Tpm4/Tpm3/Fermt3/Actb	8
GO:0045263	GO:0045263	proton-transporting ATP synthase complex, coupling factor F(o)	6/390	14/17576	2.96749e-07	7.37186e-06	5.68837e-06	Atp5me/Atp5po/Atp5pd/Dmac2l/Atp5mf/Atp5mg	6
GO:0031252	GO:0031252	cell leading edge	26/390	391/17576	7.06957e-07	1.66842e-05	1.28741e-05	Actr3/Arf6/Actr2/Abi3/Srgap2/Ywhaz/Arpc3/Anxa2/Slk/S100a6/Cyfip1/Arf4/Arpc2/Parva/Snx1/Vim/Coro1a/Diaph1/Cfl1/Twf1/Rasa1/Abi1/Myadm/Actn1/Itga5/Lima1	26
GO:0016469	GO:0016469	proton-transporting two-sector ATPase complex	9/390	49/17576	1.11462e-06	2.50524e-05	1.93312e-05	Atp5me/Atp5po/Atp5f1b/Atp5pd/Dmac2l/Atp5mf/Atp5mg/LOC103693430/Atp5f1e	9
GO:0000276	GO:0000276	mitochondrial proton-transporting ATP synthase complex, coupling factor F(o)	5/390	12/17576	3.65238e-06	7.83602e-05	6.04653e-05	Atp5me/Atp5po/Atp5pd/Atp5mf/Atp5mg	5
GO:0042470	GO:0042470	melanosome	11/390	90/17576	4.82593e-06	9.49099e-05	7.32355e-05	Erp29/Nap1l1/Tmed10/Ywhaz/Gpnmb/Ctsb/Anxa2/Pdia3/Ppib/Cnp/P4hb	11
GO:0048770	GO:0048770	pigment granule	11/390	90/17576	4.82593e-06	9.49099e-05	7.32355e-05	Erp29/Nap1l1/Tmed10/Ywhaz/Gpnmb/Ctsb/Anxa2/Pdia3/Ppib/Cnp/P4hb	11
GO:0070069	GO:0070069	cytochrome complex	7/390	32/17576	5.23219e-06	9.87838e-05	7.62248e-05	Cox6c/Cyc1/Uqcrfs1/Ugt1a1/Uqcrb/COX2/Uqcrc1	7
GO:0030863	GO:0030863	cortical cytoskeleton	12/390	113/17576	7.91394e-06	0.000143668	0.000110859	Actr2/Dstnl1/Sptb/Mapre1/Capza1/Tpm4/Tpm3/Coro1a/Cfl1/Actb/Myadm/Actn1	12
GO:0033177	GO:0033177	proton-transporting two-sector ATPase complex, proton-transporting domain	6/390	23/17576	8.42035e-06	0.0001472	0.000113585	Atp5me/Atp5po/Atp5pd/Dmac2l/Atp5mf/Atp5mg	6
GO:0005764	GO:0005764	lysosome	24/390	397/17576	9.69625e-06	0.000163451	0.000126124	Marcks/Gusb/Sod1/Fyco1/Lgmn/Naga/Nppa/Ywhaz/Plbd1/Pon2/Fuca1/Akr1b1/Ada/Ctsb/Anxa2/Dync1li1/Anxa11/Ppt1/Dpp7/Got1/Cd1d1/Snx1/Anxa1/Ctsz	24
GO:0000323	GO:0000323	lytic vacuole	24/390	398/17576	1.01113e-05	0.000164569	0.000126987	Marcks/Gusb/Sod1/Fyco1/Lgmn/Naga/Nppa/Ywhaz/Plbd1/Pon2/Fuca1/Akr1b1/Ada/Ctsb/Anxa2/Dync1li1/Anxa11/Ppt1/Dpp7/Got1/Cd1d1/Snx1/Anxa1/Ctsz	24
GO:0045239	GO:0045239	tricarboxylic acid cycle enzyme complex	5/390	15/17576	1.31067e-05	0.000206211	0.000159119	Fh/Dlst/Suclg1/Bckdhb/Bckdk	5
GO:0001726	GO:0001726	ruffle	14/390	161/17576	1.4601e-05	0.000222312	0.000171543	Actr3/Arf6/Anxa2/S100a6/Arf4/Arpc2/Diaph1/Cfl1/Twf1/Rasa1/Myadm/Actn1/Itga5/Lima1	14
GO:0030139	GO:0030139	endocytic vesicle	14/390	166/17576	2.06399e-05	0.000304438	0.000234914	Fmnl1/Cybb/Arf6/Srgap2/Flnb/Anxa11/Igf2r/Vim/Picalm/Rab5c/Coro1a/Ecpas/Pld4/Rab31	14
GO:0042383	GO:0042383	sarcolemma	14/390	167/17576	2.20823e-05	0.000315843	0.000243715	Sgcb/Sgcd/Flnc/Atp1a2/Ctsb/Anxa2/Aqp1/Got2/Synm/Snta1/Rtn2/Anxa1/Bgn/Actn1	14
GO:0005788	GO:0005788	endoplasmic reticulum lumen	9/390	71/17576	2.6284e-05	0.000364884	0.000281556	Erp29/Kdelc2/Tmem43/Txndc12/Uggt1/Pdia3/Ppib/P4hb/P4ha1	9
GO:0005885	GO:0005885	Arp2/3 protein complex	4/390	10/17576	4.50948e-05	0.000608136	0.000469257	Actr3/Actr2/Arpc3/Arpc2	4
GO:0005750	GO:0005750	mitochondrial respiratory chain complex III	4/390	11/17576	6.96233e-05	0.000912838	0.000704376	Cyc1/Uqcrfs1/Uqcrb/Uqcrc1	4
GO:0032432	GO:0032432	actin filament bundle	9/390	83/17576	9.18238e-05	0.00117137	0.000903871	Marcks/Flnb/Tpm4/Tpm3/Cfl1/Actb/Cnn2/Actn1/Lima1	9
GO:0045275	GO:0045275	respiratory chain complex III	4/390	12/17576	0.000102609	0.00127451	0.000983452	Cyc1/Uqcrfs1/Uqcrb/Uqcrc1	4
GO:0030027	GO:0030027	lamellipodium	13/390	171/17576	0.000117866	0.00142648	0.00110072	Actr3/Actr2/Abi3/Srgap2/Arpc3/Cyfip1/Arpc2/Parva/Snx1/Coro1a/Cfl1/Abi1/Actn1	13
GO:0045335	GO:0045335	phagocytic vesicle	9/390	88/17576	0.000144824	0.00170892	0.00131866	Fmnl1/Cybb/Srgap2/Flnb/Anxa11/Vim/Coro1a/Pld4/Rab31	9
GO:0005884	GO:0005884	actin filament	10/390	110/17576	0.000168396	0.0019386	0.00149589	Actr3/Arpc3/Cnn3/Arpc2/Tpm4/Tpm3/Anxa1/Coro1a/Twf1/Actn1	10
GO:0016528	GO:0016528	sarcoplasm	8/390	72/17576	0.000189552	0.00213021	0.00164374	Sgcd/Flnc/Fkbp1a/Thbs4/Fabp3/Rtn2/Hrc/Pygm	8
GO:0005769	GO:0005769	early endosome	17/390	282/17576	0.000198955	0.00218388	0.00168515	Ccdc93/Arf6/Gpnmb/Washc5/Anxa2/Prdx3/Appl1/Igf2r/Cd1d1/Snx1/Anxa1/Picalm/Rab5c/Coro1a/Nucb1/Ecpas/Rab31	17
GO:0005777	GO:0005777	peroxisome	11/390	136/17576	0.000227701	0.00238833	0.00184291	Sod1/Atad1/Idh2/Zadh2/Gstk1/Hsdl2/Vim/Dhrs4/Prdx5/Eci2/Pecr	11
GO:0042579	GO:0042579	microbody	11/390	136/17576	0.000227701	0.00238833	0.00184291	Sod1/Atad1/Idh2/Zadh2/Gstk1/Hsdl2/Vim/Dhrs4/Prdx5/Eci2/Pecr	11
GO:0005773	GO:0005773	vacuole	24/390	492/17576	0.000279809	0.00287108	0.00221542	Marcks/Gusb/Sod1/Fyco1/Lgmn/Naga/Nppa/Ywhaz/Plbd1/Pon2/Fuca1/Akr1b1/Ada/Ctsb/Anxa2/Dync1li1/Anxa11/Ppt1/Dpp7/Got1/Cd1d1/Snx1/Anxa1/Ctsz	24
GO:0044448	GO:0044448	cell cortex part	13/390	194/17576	0.000407451	0.00409185	0.00315741	Actr2/Dstnl1/Sptb/Mapre1/Capza1/Tpm4/Tpm3/Coro1a/Cfl1/Actb/Ctsz/Myadm/Actn1	13
GO:0030864	GO:0030864	cortical actin cytoskeleton	8/390	81/17576	0.000428489	0.00421347	0.00325125	Actr2/Dstnl1/Sptb/Capza1/Coro1a/Cfl1/Myadm/Actn1	8
GO:0009295	GO:0009295	nucleoid	6/390	45/17576	0.000450093	0.00424888	0.00327857	Atp5f1b/Hsd17b10/Tefm/Vdac2/Dbt/Hadha	6
GO:0042645	GO:0042645	mitochondrial nucleoid	6/390	45/17576	0.000450093	0.00424888	0.00327857	Atp5f1b/Hsd17b10/Tefm/Vdac2/Dbt/Hadha	6
GO:0031970	GO:0031970	organelle envelope lumen	8/390	83/17576	0.000505677	0.00467999	0.00361123	Cpox/Sod1/Ndufa8/Ndufs1/Igf2r/Pdia3/Ndufb7/Tubb5	8
GO:0005938	GO:0005938	cell cortex	17/390	314/17576	0.000684901	0.0062168	0.00479708	Marcks/Arf6/Actr2/Dstnl1/Sptb/Anxa2/Mapre1/Rhoc/Capza1/Tpm4/Tpm3/Coro1a/Cfl1/Actb/Ctsz/Myadm/Actn1	17
GO:0045121	GO:0045121	membrane raft	19/390	373/17576	0.000710633	0.00632866	0.0048834	Itgb2/Atp5f1b/Atp1a2/Ctsb/Anxa2/Slc25a4/Aqp1/Ppt1/Ldhb/Vdac2/Efhd2/Hmox1/Cd14/Slc27a1/Stat6/Actb/Myadm/Tuba1b/Tubb5	19
GO:0098857	GO:0098857	membrane microdomain	19/390	374/17576	0.000733758	0.00641359	0.00494893	Itgb2/Atp5f1b/Atp1a2/Ctsb/Anxa2/Slc25a4/Aqp1/Ppt1/Ldhb/Vdac2/Efhd2/Hmox1/Cd14/Slc27a1/Stat6/Actb/Myadm/Tuba1b/Tubb5	19
GO:0005903	GO:0005903	brush border	10/390	133/17576	0.0007731	0.0066346	0.00511947	Actr3/Flnb/Aqp1/Capza1/Tpm3/Diaph1/Dcxr/Myl6l/Actn1/Lima1	10
GO:0099568	GO:0099568	cytoplasmic region	23/390	498/17576	0.000791465	0.00667092	0.0051475	Marcks/Itgb2/Sod1/Arf6/Actr2/Dstnl1/Sptb/Akr1b1/Ada/Anxa2/Mapre1/Rhoc/Capza1/Tpm4/Tpm3/Coro1a/Cfl1/Dynlrb1/Rangap1/Actb/Ctsz/Myadm/Actn1	23
GO:0031674	GO:0031674	I band	10/390	135/17576	0.000867792	0.00710066	0.0054791	Flnc/Fkbp1a/Synpo2l/Ankrd2/Obsl1/Parva/Ankrd1/Hrc/Tnni3k/Actn1	10
GO:0042629	GO:0042629	mast cell granule	4/390	20/17576	0.000872538	0.00710066	0.0054791	Nppa/Ywhaz/Akr1b1/Anxa1	4
GO:0098862	GO:0098862	cluster of actin-based cell projections	12/390	185/17576	0.000896896	0.00717517	0.0055366	Actr3/Flnb/Aqp1/Rhoc/Capza1/Tpm3/Coro1a/Diaph1/Dcxr/Myl6l/Actn1/Lima1	12
GO:0098589	GO:0098589	membrane region	19/390	388/17576	0.00113227	0.00890719	0.00687308	Itgb2/Atp5f1b/Atp1a2/Ctsb/Anxa2/Slc25a4/Aqp1/Ppt1/Ldhb/Vdac2/Efhd2/Hmox1/Cd14/Slc27a1/Stat6/Actb/Myadm/Tuba1b/Tubb5	19
GO:0001725	GO:0001725	stress fiber	7/390	74/17576	0.00125918	0.00958598	0.00739685	Flnb/Tpm4/Tpm3/Actb/Cnn2/Actn1/Lima1	7
GO:0097517	GO:0097517	contractile actin filament bundle	7/390	74/17576	0.00125918	0.00958598	0.00739685	Flnb/Tpm4/Tpm3/Actb/Cnn2/Actn1/Lima1	7

## Sheet: MF_Prot+RNA
	ID	Description	GeneRatio	BgRatio	pvalue	p.adjust	qvalue	geneID	Count
GO:0050662	GO:0050662	coenzyme binding	43/379	299/16018	1.00543e-21	5.9823e-19	4.69905e-19	Acacb/Acads/Plod3/Txnrd2/Ugdh/Hsd17b10/Acbd3/Qdpr/Cybb/Gclc/Plod1/Acot11/Acat1/Hibadh/Mdh1/Decr1/Ivd/Hadh/Got2/Grhpr/Acadl/Ldhb/Sdha/Idh2/Dbt/Etfa/Me2/Got1/Sord/Ndufv1/Ldhd/Pygm/Aldh5a1/Cbr4/Hadha/Eci2/Plod2/Pam/Fmo1/Ndufs2/P4ha1/P3h1/G6pd	43
GO:0016655	GO:0016655	oxidoreductase activity, acting on NAD(P)H, quinone or similar compound as acceptor	16/379	40/16018	2.64089e-16	7.85664e-14	6.17134e-14	Ndufb4/Ndufa5/Ndufa7/Ndufa12/Ndufs3/Ndufs4/Ndufs1/Ndufb8/Ndufv1/Dhrs4/Ndufa13/Cbr4/Ndufb7/Ndufs2/Dcxr/Ndufaf2	16
GO:0003954	GO:0003954	NADH dehydrogenase activity	14/379	29/16018	7.63605e-16	1.51448e-13	1.18962e-13	Ndufb4/Ndufa5/Ndufa7/Ndufa12/Ndufs3/Ndufs4/Ndufs1/Ndufb8/Ndufv1/Ndufa13/Ndufb7/Ndufs2/Ndufaf2/Ndufa9	14
GO:0008137	GO:0008137	NADH dehydrogenase (ubiquinone) activity	13/379	27/16018	8.8304e-15	1.05082e-12	8.2541e-13	Ndufb4/Ndufa5/Ndufa7/Ndufa12/Ndufs3/Ndufs4/Ndufs1/Ndufb8/Ndufv1/Ndufa13/Ndufb7/Ndufs2/Ndufaf2	13
GO:0050136	GO:0050136	NADH dehydrogenase (quinone) activity	13/379	27/16018	8.8304e-15	1.05082e-12	8.2541e-13	Ndufb4/Ndufa5/Ndufa7/Ndufa12/Ndufs3/Ndufs4/Ndufs1/Ndufb8/Ndufv1/Ndufa13/Ndufb7/Ndufs2/Ndufaf2	13
GO:0016651	GO:0016651	oxidoreductase activity, acting on NAD(P)H	19/379	83/16018	5.23558e-14	5.19195e-12	4.07824e-12	Txnrd2/Ndufb4/Cybb/Ndufa5/Ndufa7/Ndufa12/Ndufs3/Ndufs4/Ndufs1/Ndufb8/Ndufv1/Dhrs4/Ndufa13/Cbr4/Ndufb7/Ndufs2/Dcxr/Ndufaf2/Ndufa9	19
GO:0016616	GO:0016616	oxidoreductase activity, acting on the CH-OH group of donors, NAD or NADP as acceptor	22/379	121/16018	8.39425e-14	7.13511e-12	5.60458e-12	Mdh2/Ugdh/Hsd17b10/Adhfe1/Hibadh/Mdh1/Akr1b1/Hadh/Grhpr/Ldhb/Idh2/Me2/Zadh2/Sord/Akr7a2/Dhrs4/Ldhd/Akr1c15/Cbr4/Hadha/Dcxr/G6pd	22
GO:0016614	GO:0016614	oxidoreductase activity, acting on CH-OH group of donors	22/379	132/16018	5.37261e-13	3.99588e-11	3.13874e-11	Mdh2/Ugdh/Hsd17b10/Adhfe1/Hibadh/Mdh1/Akr1b1/Hadh/Grhpr/Ldhb/Idh2/Me2/Zadh2/Sord/Akr7a2/Dhrs4/Ldhd/Akr1c15/Cbr4/Hadha/Dcxr/G6pd	22
GO:0009055	GO:0009055	electron transfer activity	17/379	76/16018	1.71064e-12	1.13093e-10	8.88334e-11	Txnrd2/Cybb/Ndufa12/Sdhb/Etfdh/Cox6c/Ndufs1/Cyc1/Sdha/Etfa/Sh3bgrl3/Etfb/Uqcrfs1/Uqcrb/COX2/Cox7a2/Ndufaf2	17
GO:0051287	GO:0051287	NAD binding	15/379	65/16018	2.19018e-11	1.30315e-09	1.02362e-09	Ugdh/Hsd17b10/Qdpr/Hibadh/Mdh1/Hadh/Grhpr/Ldhb/Idh2/Me2/Sord/Ndufv1/Aldh5a1/Hadha/Ndufs2	15
GO:0048029	GO:0048029	monosaccharide binding	14/379	80/16018	4.9657e-09	2.68599e-07	2.10983e-07	Pfkl/Plod3/Galk1/Plod1/Lgals3/Igf2r/Mrc1/Hk3/Plod2/Pam/P4ha1/P3h1/G6pd/Pfkm	14
GO:0003779	GO:0003779	actin binding	30/379	376/16018	6.44711e-09	3.19669e-07	2.51098e-07	Marcks/Actr3/Fmnl1/Actr2/Dstnl1/Sptb/Flnc/Arpc3/Synpo2l/Flnb/Anxa2/Cnn3/S100a4/Capza1/Map1a/Arpc2/Obsl1/Tpm4/Parva/Cotl1/Tpm3/Coro1a/Diaph1/Cfl1/Twf1/Hcls1/Cnn2/Tmsb4x/Actn1/Lima1	30
GO:0016874	GO:0016874	ligase activity	17/379	149/16018	8.87966e-08	4.06415e-06	3.19236e-06	Acacb/Acsf2/Adss/Suclg1/Gclc/Acss1/Acat1/Nars2/Mccc1/Acsf3/Sae1/Pccb/Acsl5/Sucla2/Slc27a1/Kars/Uba6	17
GO:0051015	GO:0051015	actin filament binding	19/379	188/16018	1.10066e-07	4.67779e-06	3.67437e-06	Marcks/Actr3/Fmnl1/Actr2/Dstnl1/Sptb/Flnc/Arpc3/Anxa2/Capza1/Arpc2/Obsl1/Tpm4/Tpm3/Coro1a/Cfl1/Twf1/Actn1/Lima1	19
GO:0005200	GO:0005200	structural constituent of cytoskeleton	11/379	65/16018	3.20568e-07	1.27159e-05	9.98822e-06	Actr3/Actr2/Sptb/Arpc3/Synm/Arpc2/Tubb3/Vim/Actb/Tuba1b/Tubb5	11
GO:0016853	GO:0016853	isomerase activity	16/379	146/16018	3.72063e-07	1.38361e-05	1.08682e-05	Fkbp3/Fkbp4/Fkbp1a/Pgm3/Pgam2/Pdia3/Fkbp10/Ppib/Ppic/Naxe/Mri1/Eci2/P4hb/Gstz1/Pgam1/Mut	16
GO:0016877	GO:0016877	ligase activity, forming carbon-sulfur bonds	8/379	35/16018	1.22764e-06	4.29673e-05	3.37505e-05	Suclg1/Acss1/Acsf3/Sae1/Acsl5/Sucla2/Slc27a1/Uba6	8
GO:0019842	GO:0019842	vitamin binding	14/379	132/16018	2.96091e-06	9.78744e-05	7.68797e-05	Acacb/Plod3/Plod1/Got2/Rbp1/Got1/Ndufab1/Pygm/Plod2/Pam/Mmab/P4ha1/Mut/P3h1	14
GO:0031418	GO:0031418	L-ascorbic acid binding	6/379	19/16018	3.52525e-06	0.000110396	8.67153e-05	Plod3/Plod1/Plod2/Pam/P4ha1/P3h1	6
GO:0051536	GO:0051536	iron-sulfur cluster binding	9/379	56/16018	5.99456e-06	0.000169846	0.000133413	Cisd1/Sdhb/Etfdh/Ndufs1/Ndufv1/Uqcrfs1/Isca1/Aco2/Ndufs2	9
GO:0051540	GO:0051540	metal cluster binding	9/379	56/16018	5.99456e-06	0.000169846	0.000133413	Cisd1/Sdhb/Etfdh/Ndufs1/Ndufv1/Uqcrfs1/Isca1/Aco2/Ndufs2	9
GO:0031406	GO:0031406	carboxylic acid binding	17/379	206/16018	8.40486e-06	0.000227313	0.000178553	Acacb/Plod3/Gclc/Plod1/Got2/Grhpr/Fabp3/Igf2r/Dbt/Got1/Ugt1a1/Kars/Aldh5a1/Plod2/Pam/P4ha1/P3h1	17
GO:1901681	GO:1901681	sulfur compound binding	18/379	233/16018	1.14111e-05	0.000295199	0.000231877	Acacb/Acads/Fstl1/Acbd3/Acot11/Gpnmb/Ltbp2/Thbs4/Postn/Acadl/Lancl1/Dbt/Anxa4/Hadha/Pcolce/Eci2/Gsta4/Cfh	18
GO:0016878	GO:0016878	acid-thiol ligase activity	6/379	24/16018	1.58197e-05	0.000392196	0.000308067	Suclg1/Acss1/Acsf3/Acsl5/Sucla2/Slc27a1	6
GO:0043177	GO:0043177	organic acid binding	17/379	217/16018	1.66458e-05	0.00039617	0.000311189	Acacb/Plod3/Gclc/Plod1/Got2/Grhpr/Fabp3/Igf2r/Dbt/Got1/Ugt1a1/Kars/Aldh5a1/Plod2/Pam/P4ha1/P3h1	17
GO:0046933	GO:0046933	proton-transporting ATP synthase activity, rotational mechanism	5/379	15/16018	1.78368e-05	0.000408188	0.000320629	Atp5po/Atp5f1b/Atp5pd/Atp5mg/Atp5f1e	5
GO:0016627	GO:0016627	oxidoreductase activity, acting on the CH-CH group of donors	8/379	52/16018	2.76326e-05	0.000608941	0.000478319	Acads/Cpox/Sdhb/Decr1/Ivd/Acadl/Sdha/Pecr	8
GO:0015036	GO:0015036	disulfide oxidoreductase activity	7/379	39/16018	3.14345e-05	0.000667982	0.000524696	Txnrd2/Txn2/Txndc12/Pdia3/Sh3bgrl3/Gstk1/P4hb	7
GO:0000062	GO:0000062	fatty-acyl-CoA binding	6/379	27/16018	3.27633e-05	0.000672212	0.000528018	Acads/Acbd3/Acot11/Acadl/Hadha/Eci2	6
GO:0016667	GO:0016667	oxidoreductase activity, acting on a sulfur group of donors	8/379	56/16018	4.8035e-05	0.000952694	0.000748334	Txnrd2/Txn2/Txndc12/Pdia3/Sh3bgrl3/Gstk1/P4hb/Selenbp1	8
GO:0016859	GO:0016859	cis-trans isomerase activity	7/379	42/16018	5.1873e-05	0.000995627	0.000782058	Fkbp3/Fkbp4/Fkbp1a/Fkbp10/Ppib/Ppic/Gstz1	7
GO:0048038	GO:0048038	quinone binding	5/379	20/16018	8.35212e-05	0.00155297	0.00121985	Sdhb/Etfdh/Cbr4/Coq10a/Ndufs2	5
GO:0051539	GO:0051539	4 iron, 4 sulfur cluster binding	6/379	33/16018	0.000108738	0.00196058	0.00154002	Sdhb/Etfdh/Ndufs1/Ndufv1/Aco2/Ndufs2	6
GO:0033218	GO:0033218	amide binding	21/379	362/16018	0.00015278	0.00267364	0.00210013	Acacb/Acads/Itgb2/Hsd17b10/Acbd3/Plod1/Acot11/Ctsb/Acadl/Lancl1/Sec61a1/Cd1d1/Ppib/Tubb3/Ppic/Cd14/Ndufab1/Hadha/Crip1/Eci2/Gsta4	21
GO:0030246	GO:0030246	carbohydrate binding	17/379	260/16018	0.000159457	0.00269015	0.0021131	Gusb/Pfkl/Plod3/Galk1/Plod1/Fuca1/Lgals3/Igf2r/Mrc1/Pygm/Hk3/Plod2/Pam/P4ha1/P3h1/G6pd/Pfkm	17
GO:0050660	GO:0050660	flavin adenine dinucleotide binding	9/379	84/16018	0.000162765	0.00269015	0.0021131	Acads/Txnrd2/Cybb/Ivd/Acadl/Sdha/Etfa/Ldhd/Fmo1	9
GO:1901567	GO:1901567	fatty acid derivative binding	6/379	36/16018	0.000180123	0.00289657	0.00227523	Acads/Acbd3/Acot11/Acadl/Hadha/Eci2	6
GO:0043027	GO:0043027	cysteine-type endopeptidase inhibitor activity involved in apoptotic process	5/379	24/16018	0.000211808	0.00323142	0.00253826	Rps6ka3/Prdx3/Dpep1/Prdx5/Serpinb9	5
GO:0051537	GO:0051537	2 iron, 2 sulfur cluster binding	5/379	24/16018	0.000211808	0.00323142	0.00253826	Cisd1/Sdhb/Ndufs1/Uqcrfs1/Isca1	5
GO:0050661	GO:0050661	NADP binding	7/379	53/16018	0.000237093	0.00352676	0.00277025	Qdpr/Hibadh/Decr1/Grhpr/Cbr4/Fmo1/G6pd	7
GO:0003755	GO:0003755	peptidyl-prolyl cis-trans isomerase activity	6/379	38/16018	0.000245322	0.00356017	0.00279649	Fkbp3/Fkbp4/Fkbp1a/Fkbp10/Ppib/Ppic	6
GO:0072341	GO:0072341	modified amino acid binding	9/379	92/16018	0.000325474	0.00461088	0.00362182	Marcks/Gsdmd/Anxa2/Lancl1/Dpep1/Mfge8/Ndufab1/Gsta4/Mut	9
GO:0016208	GO:0016208	AMP binding	4/379	16/16018	0.000448041	0.00605873	0.00475909	Pfkl/Acss1/Pygm/Pfkm	4
GO:0070402	GO:0070402	NADPH binding	4/379	16/16018	0.000448041	0.00605873	0.00475909	Qdpr/Decr1/Grhpr/Cbr4	4
GO:0016706	GO:0016706	oxidoreductase activity, acting on paired donors, with incorporation or reduction of molecular oxygen, 2-oxoglutarate as one donor, and incorporation of one atom each of oxygen into both donors	6/379	45/16018	0.00062975	0.00832669	0.00654056	Plod3/Plod1/Plod2/P4hb/P4ha1/P3h1	6
GO:0015078	GO:0015078	proton transmembrane transporter activity	10/379	123/16018	0.000683723	0.00884381	0.00694675	Atp5me/Atp5po/Atp5f1b/Atp5pd/Slc25a3/Cox6c/Atp5mg/COX2/Cox7a2/Atp5f1e	10
GO:0044769	GO:0044769	ATPase activity, coupled to transmembrane movement of ions, rotational mechanism	5/379	31/16018	0.000739088	0.00935655	0.0073495	Atp5po/Atp5f1b/Atp5pd/Atp5mg/Atp5f1e	5
